## 25 **Abstract**

26 In treating patients with castration resistant prostate cancer (CRPC), enzalutamide, the second-  
27 generation androgen receptor (AR) antagonist, is an accepted standard of care. However, clinical  
28 benefits are limited to a median time of 4.8 months because resistance inevitably emerges. To  
29 determine the mechanism of treatment resistance, we carried out a RNA sequence analysis and  
30 found increased expression levels of neuroendocrine markers in the enzalutamide-resistant LNCaP  
31 human prostate cancer (CaP) cell line when compared to the parental cell line. Subsequent studies  
32 demonstrated that TCF4, a transcription factor implicated in Wnt signaling, mediated  
33 neuroendocrine differentiation (NED) in response to enzalutamide treatment and was elevated in  
34 the enzalutamide-resistant LNCaP. In addition, we observed that PTHrP mediated enzalutamide  
35 resistance in tissue culture and inducible TCF4 overexpression resulted in enzalutamide-resistance  
36 in a mouse xenograft model. Finally, small molecule inhibitors of TCF4 or PTHrP partially  
37 reversed enzalutamide resistance in CaP cells. When tissues obtained from men who died of  
38 metastatic CaP were examined, a positive correlation was found between the expression levels of  
39 TCF4 and PTHrP. Taken together, the current results indicate that TCF4 induces enzalutamide  
40 resistance via NED in CaP.

## 41 **Introduction**

42 Prostate cancer (CaP) is the most common non-cutaneous cancer diagnosed among men and the  
43 second leading cause of male cancer deaths in the United States (1). In 2017, it is estimated that  
44 26,730 men died from CaP. Although radiation and surgery are quite effective for localized disease,  
45 approximately 30% eventually recur following a definitive therapy. More importantly, there is no  
46 effective cure for men who present with metastatic CaP as the 5-year relative survival rate is only  
47 29% (1). In patients with a metastatic disease, medical or surgical castration is generally the  
48 accepted first-line therapy. Yet, castration-resistant prostate cancer (CRPC) eventually emerges  
49 with a median time of 18-24 months (2, 3). Once CRPC develops, secondary hormonal  
50 manipulation, immunotherapy, and chemotherapy are marginally effective and the average life  
51 expectancy is ~5 years (4, 5).

52 Enzalutamide is a FDA-approved second-generation androgen receptor (AR) antagonist  
53 that blocks ligand binding, nuclear translocation, DNA binding, and coactivator recruitment of  
54 ARs (6). In multiple clinical trials, enzalutamide has been shown to prolong overall and  
55 progression-free survival, improve patient-reported quality of life, and delay the development of  
56 skeletal-related complications in men with metastatic CRPC who are chemotherapy naïve or have  
57 previously received docetaxel (7-9). However, despite the significant initial therapeutic benefits  
58 of enzalutamide, resistance inevitably occurs with a median time of 4.8 months. Although the  
59 precise mechanistic details underlying the emergence of enzalutamide resistance is largely  
60 unknown, the activation of adaptive survival pathways in an androgen-depleted environment is  
61 likely important.

62 TCF4, also known as transcription factor 7-like 2 (TCF7L2), is an important effector of the  
63 canonical Wnt signaling pathway (10). Although dysregulated Wnt signaling has extensively been

64 linked to CaP cells (11-13), TCF4 has not been demonstrated directly to play a role in CaP  
65 progression. In an effort to identify critical pathways involved in enzalutamide resistance, we  
66 developed multiple enzalutamide-resistant human CaP cell lines and found that TCF4 mediates  
67 enzalutamide resistance in CaP cells by inducing neuroendocrine differentiation (NED) via a Wnt-  
68 independent mechanism.

69

## 70 **Materials and Methods**

### 71 **Cell culture**

72 Human prostate cancer cell lines, LNCaP, 22Rv1, and VCaP were obtained from the American  
73 Type Culture Collection (Manassas, VA) and maintained in the standard culture media: RPMI-  
74 1640 supplemented with 10% fetal bovine serum (FBS). TCF4 cDNA (Origene, Cat# 224345,  
75 Rockville, MD) was cloned into pLenti4/V5-Dest expression vector (ThermoFisher, Waltham,  
76 MA). After making pLenti4/V5-Dest/TCF4 viral supernatant with the Optimized Packaging Mix,  
77 the supernatant was added to the Virapower T-Rex LNCaP. After selection with Zeocin and  
78 Blasticidin, TCF4-inducible LNCaP (TCF4/LNCaP) were selected and the expression of TCF4  
79 was screened using quantitative PCR (QPCR). Selected clones were cultured in RPMI-1640/10%  
80 FBS media containing 100 mg/ml of Blasticidin and Zeocin (Life Technologies, Carlsbad, CA,  
81 USA). To establish enzalutamide resistant CaP cell lines, cells were treated continuously with  
82 10 $\mu$ M enzalutamide (Selleckchem, Houston, TX, USA, Cat# S1250). After three months, stable  
83 cell lines were established (LNCaP-EnzR, VCaP-EnzR, and 22Rv1-EnzR). Unless specified, the  
84 standard culture media for these three enzalutamide-resistant cell lines included 10  $\mu$ M

85 enzalutamide. The  $\beta$ -catenin degradation activator was purchased from (Selleckchem, Houston,  
86 TX, USA, Cat# S1180).

87

## 88 **Mice study**

89 All mice and experimental procedures were conducted using protocols approved by and in  
90 accordance with the Rutgers Cancer Institute of New Jersey Institutional Animal Care and Use  
91 Committee approval (PROTO999900168) and the National Institutes of Health Guide for the Care  
92 and Use of Laboratory Animals. For anesthesia, 3% isoflurane gas inhalation method was used.  
93 Rag2<sup>-/-</sup>,  $\gamma$ c<sup>-/-</sup> mice were purchased from The Jackson Laboratory (Bar Harbor, Maine, USA). The  
94 study was approved by the Institutional Animal Care and Use Committee at the Rutgers University  
95 (New Brunswick, NJ). Where indicated, surgical castration was carried out via bilateral  
96 orchiectomy. Tumor size was measured using calipers and tumor volume was calculated using the  
97 formula: tumor volume= length x width<sup>2</sup> /0.361. Doxycycline-inducible TCF4-expressing cells  
98 were subcutaneously injected into five mice per group. Mice were supplied with water containing  
99 2 mg/ml of doxycycline (Sigma-Aldrich, Saint Louis, MI, USA) in 5 % sucrose to induce TCF4.

100 To explore the therapeutic implications of targeting TCF4/NED pathway, LNCaP-EnzR  
101 was injected into forty Rag2<sup>-/-</sup>,  $\gamma$ c<sup>-/-</sup> immunodeficient mice. When tumors reached an average size  
102 of 3 mm in diameter, all animals were surgically castrated and divided into four groups of ten mice  
103 each. TCF4/ $\beta$ -catenin interaction was disrupted with PKF118-310 while PTHrP was blocked with  
104 PTHrP<sub>(7-34)</sub>. PKF118-310 was purchased from Millipore (Burlington, MA, Cat# 219331) and  
105 PTHrP<sub>(7-34)</sub> Bachem (Torrance, CA, Cat# H-9100.0500). Mice were injected daily with the  
106 PKF118-310 (0.85 mg/kg, intraperitoneal) and/or PTHrP<sub>(7-34)</sub> (0.2 mg/kg, subcutaneous) for four

107 weeks. Where indicated, enzalutamide was administered daily via oral gavage at 10 mg/kg in 1%  
108 carboxymethyl cellulose, 0.1% Tween-80, and 5% DMSO (14-16). Tumor volume and body  
109 weight were measured weekly. Four weeks after castration, all animals were sacrificed and tumors  
110 were harvested and analyzed for the expression of TCF4 and PTHrP using immunofluorescence  
111 microscopy. Animals were euthanized by CO<sub>2</sub> asphyxiation after PKC118-310 and/or PTHrP<sub>(7-34)</sub>  
112 treatment were completed.

113

#### 114 **RNA sequencing**

115 RNA was purified using DirectZol RNA purification kit (Zymoresearch, Irvine, CA, Cat#  
116 R2060) from LNCaP, charcoal stripped FBS (cFBS)-resistant LNCaP (LNCaP-cFBSR), and  
117 LNCaP-EnzR. Then, RNA sequencing was performed by Macrogen, Inc. (Washington D.C.,  
118 USA) using purified RNA.

119

#### 120 **Transient Transfections**

121 One µg of a plasmid containing TCF4 cDNA (Origene, Cat# 2243345, Rockville, MD) was  
122 transfected into indicated prostate cancer cell lines on a 6-well plate. Three µl of lipofectamine  
123 3000 (ThermoFisher, Waltham, MA, USA, Cat# L3000015) was used for each transfection.

124

#### 125 **Quantitative RT-PCR and PCR**

126 Total RNA was isolated with TRIzol LS reagent (Thermo Fisher Scientific, Waltham, MA,  
127 USA), and 1-2 µg of total RNA was used for synthesizing cDNA with High-Capacity cDNA

128 Reverse Transcription Kit (Thermo Fisher Scientific, Waltham, MA, USA). cDNA was then  
129 used for Q-PCR in a StepOnePlus™ (Applied Biosystems, Foster City, CA, USA) with SYBR  
130 Green ROX qPCR Mastermix (QIAGEN, Valencia, CA, USA). Sequences of PCR primers used  
131 are as follows: human QPCR ChgA (forward: GAAGAGGAGGAGGAGGAGGA, reverse:  
132 CACTCAGGCCCTTCTCTCTG); human QPCR  $\beta$ -actin (forward:  
133 AGAGCTACGAGCTGCCTGAC, reverse: AGCACTGTGTTGGCGTACAG); human QPCR  
134 TCF4 (forward: CCTGGCTATGCAGGAATGTT, reverse:  
135 CAGGAGGCGTACAGGAAGAG ); human QPCR NSE (forward:  
136 GGTCCAAGTTCACAGCCAAT, reverse: CAGTTGCAGGCCTTTTCTTC ); human QPCR  
137 PTHrP (forward: CAAGATTTACGGCGACGATT, reverse: GAGAGGGCTTGGAGTTAGGG)  
138

### 139 **Immunoblot analysis**

140 CaP cells were collected and lysed with lysis buffer (20 mM Tris-HCl (pH 7.5), 150 mM NaCl, 1  
141 mM Na<sub>2</sub>EDTA, 1 mM EGTA, 1% Triton, 2.5 mM sodium pyrophosphate, 1 mM beta-  
142 glycerophosphate, 1 mM Na<sub>3</sub>VO<sub>4</sub>, 1  $\mu$ g/ml leupeptin) containing 1 mM phenylmethylsulfonyl  
143 fluoride (PMSF). Cell lysates were centrifuged and protein in the supernatant was measured. After  
144 separating of 25-50 $\mu$ g protein using SDS-PAGE, samples were incubated with TCF4 (Cell  
145 Signaling Technologies, Danvers, MA, USA), ChgA (Abcam, Cambridge, MA, USA), NSE  
146 (Abcam, Cambridge, MA, USA), PTHrP (Abcam, Cambridge, MA, USA), POU2F2 (Sigma-  
147 Aldrich, Allentown, PA, USA) or  $\beta$ -actin (Sigma-Aldrich, St. Louis, MO, USA) antibodies. For  
148 ChgA, NSE, PTHrP, and POU2F2 immunoblots, 1:1000 diluted antibody solutions in 5% skim  
149 milk was used. For the  $\beta$ -actin immunoblot, 1:10000 diluted antibody solution was used. All

150 membranes were incubated overnight at 4°C. Following the incubation with appropriate secondary  
151 antibody, immunoblot was analyzed using SuperSignal West Femto Maximum Sensitivity  
152 Substrate (ThermoFisher Scientific, Waltham, MA, USA).

153

#### 154 **TCF4 knockdown**

155 TCF4 MISSION shRNA was purchased from Sigma-Aldrich (St. Louis, MO, USA, Cat#  
156 SHCLNG-NM\_003199). TCF4 shRNA lentiviral supernatant was generated with ViraPower  
157 Lentiviral Packaging Mix (Thermo Fisher Scientific, Waltham, MA, USA) and used to infect  
158 LNCaP cells. The expression of TCF4 was analyzed using QPCR and immunoblot as described  
159 above.

160

#### 161 **Analysis of human TMAs and murine tumors**

162 CRPC tissue microarray (TMA) was obtained from the University of Michigan's rapid autopsy  
163 program. The rapid autopsy program was supported by Specialized Program of Research  
164 Excellence in Prostate Cancer (SPORE, National Cancer Institute grant CA69568) and the Prostate  
165 Cancer Foundation (17). The University of Michigan Prostate Rapid Autopsy Program protocol  
166 meets all the institutional requirements as indicated by the support from the SPORE grant and the  
167 protocol is not subject to IRB-MED approval. The array contains 51 CRPC samples as well as 16  
168 benign prostate tissues and 12 localized prostate cancer tissues for controls. TMA and mouse tumor  
169 slides were scanned using the Olympus VS120 Florescence/Bright-field whole slide scanner  
170 (Olympus Scientific Solutions Americas Corp., Waltham, MA, USA) after staining with the



171 appropriate antibody. All scanned cores or slides were individually quantified using NIH ImageJ  
172 V1.50i (NIH, Bethesda, MD, USA). Values were represented as mean fluorescence intensity (MFI).  
173 Antibodies to TCF4 (Millipore) and PTHrP (Abcam, Cambridge, MA) were obtained from  
174 commercial sources.

175

## 176 **Statistical analysis**

177 Statistical significance was calculated using the Student's t-test for paired comparisons of  
178 experimental groups and, where appropriate, by Wilcoxon rank sum test, and by 2-way ANOVA.  
179 *In vitro* experiments were repeated a minimum of three times. Continuous variables were  
180 expressed as mean  $\pm$  standard deviation (SD).

181

## 182 **RESULTS**

### 183 **Enzalutamide-resistant human CaP cell line exhibits NED**

184 To investigate the mechanism of enzalutamide resistance in CaP cells, an enzalutamide-resistant  
185 human CaP cell line was initially generated by continuously treating LNCaP with 10  $\mu$ M  
186 enzalutamide in RPMI-1640 supplemented with 10% charcoal stripped fetal bovine serum (cFBS).  
187 After three months, cells began to proliferate consistently and were designated as LNCaP-EnzR.  
188 Simultaneously, LNCaP cultured chronically under cFBS was also generated (LNCaP-cFBS).  
189 With these cells, RNAseq followed by an unsupervised data analysis was carried out. When  
190 compared to the LNCaP-cFBS, there was no obvious differences in AR signaling related gene  
191 expression levels. However, NED markers such as chromogranin A (CHGA, ChgA), neuron-  
192 specific enolase (ENO2, NSE), and PTHrP (PTHLP) were significantly higher in LNCaP-EnzR

193 (Fig 1A). A similar pattern of increased NED was observed in LNCaP-cFBS when compared to  
194 the parental line maintained in the standard media (RPMI1640/10% FBS) (Fig 1B). To validate  
195 these observations, we treated the human prostate cancer cell lines LNCaP and 22Rv1 with  
196 increasing concentrations of enzalutamide (0-10  $\mu$ M) under an androgen-deprived condition  
197 (RPMI-1640/10% cFBS) for 48 hours. The results demonstrated that enzalutamide increased  
198 expression levels of ChgA, NSE, and PTHrP protein (Fig 1C) and mRNA (Fig 1D) in a  
199 concentration-dependent manner.

200

#### 201 **TCF4 mediates NED and enzalutamide resistance in human CaP cell lines**

202 Based on the observation that the mRNA levels of NED markers are induced by enzalutamide and  
203 increased in LNCaP-EnzR, we hypothesized that the anti-androgen may regulate a common  
204 transcription factor that regulates NED. To test this concept, we carried out a bioinformatics-based  
205 analysis of the ChgA, NSE, and PTHrP promoters to identify common transcription factors that  
206 potentially bind to all three NED markers (alggen, <http://alggen.lsi.upc.es/>). This effort identified  
207 consensus sequences for binding of five transcription factors within the promoters of NED markers:  
208 TCF4, POU2F2 (Oct2.1), MRF-2, LCR-F1, and MBF-1 (EDF-1). Quantitative PCR (qPCR)  
209 confirmed that mRNA levels of TCF4 and POU2F2 were significantly higher in LNCaP-EnzR  
210 when compared to the parental cell line (data not shown). This QPCR result was consistent with  
211 our transcriptome analysis that showed increased TCF4 expression levels in LNCaP-EnzR (Fig  
212 1A). To assess the role of TCF4 and POU2F2 on NED, three androgen-responsive human CaP cell  
213 lines (LNCaP, 22Rv1, and VCaP) were transiently transfected with TCF4 and POU2F2. Only cells  
214 overexpressing TCF4 demonstrated significant increase in the mRNA levels of the NED markers  
215 ChgA, NSE, and PTHrP (Fig 2A). In addition, it was found that TCF4-expressing cells were more

216 resistant to enzalutamide 10  $\mu$ M treatment as the cell number was nearly double that of the control  
217 after three days of culture (Fig 2B). This resistance was not merely due to differentiation as TCF4-  
218 expressing cells continued to proliferate in the presence of enzalutamide. When the two  
219 transcription factors were knocked down in LNCaP and 22Rv1 with shRNA, enzalutamide no  
220 longer induced the expression of ChgA, NSE, and PTHrP proteins only when TCF4 expression  
221 was blocked (Fig 2C). The kinetics of enzalutamide-induced TCF4 and NED markers expression  
222 revealed that the increase in TCF4 mRNA preceded that of the NED markers by approximately  
223 eight hours in tissue culture (Fig 2D). These results collectively demonstrate that TCF4 mediates  
224 the expression of NED markers in human CaP cell lines.

225

#### 226 **Blocking TCF4/PTHrP partially reverses enzalutamide resistance in human CaP cell lines**

227 To examine the biological significance of TCF4 and NED induction on enzalutamide resistance,  
228 we generated two additional human CaP cell lines that are resistant to enzalutamide (22Rv1-EnzR  
229 and VCaP-EnzR). Then, of the NED markers, we focused on PTHrP as a potential mediator of  
230 enzalutamide resistance because this peptide has been demonstrated to mediate castration  
231 resistance (18, 19). Consistent with the published data reporting that TCF4 is a binding partner of  
232  $\beta$ -catenin (20, 21), pretreatment with the  $\beta$ -catenin degradation activator, XAV939 (22) at 10  $\mu$ M  
233 five minutes prior to enzalutamide treatment, abrogated PTHrP mRNA induction by enzalutamide  
234 in all three human CaP cell lines (Fig 3A). In addition to the ligand, we assessed whether  
235 enzalutamide altered the expression of the PTHrP receptor, PTH1R. The result, shown in Fig 3B,  
236 revealed that 10  $\mu$ M enzalutamide significantly increased mRNA levels in LNCaP, VCaP, and  
237 22Rv1. Next, TCF4 and PTHrP were blocked in all three enzalutamide-resistant cell lines using  
238 the reported inhibitors – PKF118-310 and PTHrP<sub>(7-34)</sub> (23, 24). Both PKF118-310 and PTHrP<sub>(7-34)</sub>

239 significantly decreased the cellular proliferation of all three cell lines in a concentration-dependent  
240 manner over a three-day period. Between the two inhibitors, PTHrP<sub>(7-34)</sub> had a more moderate  
241 effect. In the three enzalutamide-resistant cell lines (LNCaP-EnzR, 22Rv1-EnzR, and VCaP-  
242 EnzR), PKF118-310 again inhibited the cellular proliferation in a concentration-dependent manner  
243 up to 50  $\mu$ M after 3 days (Fig 3C). Similarly, PTHrP<sub>(7-34)</sub> treatment also decreased cell count of  
244 LNCaP-EnzR, 22Rv1-EnzR, and VCaP-EnzR in a concentration-dependent manner up to 1 mM  
245 after 3 days. To assess whether PKF118-310 and PTHrP<sub>(7-34)</sub> affected enzalutamide sensitivity, we  
246 next cultured the three enzalutamide-resistant cell lines with a fixed concentration of PKF118-310  
247 (5  $\mu$ M) or PTHrP<sub>(7-34)</sub> (10  $\mu$ M) and varying concentrations of enzalutamide (0-10  $\mu$ M). The results  
248 demonstrated that both PKF118-310 and PTHrP<sub>(7-34)</sub> reversed enzalutamide resistance in LNCaP-  
249 EnzR, 22Rv1-EnzR, and VCaP-EnzR (Fig 3D). It should be noted that enzalutamide still exhibited  
250 a concentration-dependent inhibitory effect on all three enzalutamide-resistant cell lines,  
251 demonstrating that these cells have a relative and not an absolute resistance to enzalutamide.

252 Because TCF4 has been linked to Wnt signaling, we next examined the effect of typical  
253 canonical and non-canonical Wnts [Wnt1, 3b, 5a, and 5b (10 ng/ml)] on NED. The results  
254 demonstrated no significant effect of on the expression levels of ChgA, NSE, and PTHrP mRNA  
255 after 48 hours (Supp Fig 2). These results suggest that Wnts likely do not regulate NED in our  
256 experimental conditions and that the effect of TCF4 on NED is likely independent of the Wnt  
257 signaling pathway.

258

### 259 **In human CaP tissues, PTHrP and TCF4 co-localize and are associated with metastasis**

260 To clinically validate these observations, we next carried out immunofluorescence (IF) microscopy  
261 on the CRPC tissue microarray (TMA) obtained from the University of Michigan's rapid autopsy

262 program. Although this CRPC TMA was established prior to the formal approval of enzalutamide  
263 by the United States Food and Drug Administration, co-localization of PTHrP and TCF4 was  
264 frequently observed in CRPC tissues (Fig 4A). PTHrP and TCF4 expression had positive  
265 correlation (Fig 4B). Furthermore, metastatic CaP was found to express higher levels of TCF4  
266 and PTHrP (Fig 4C and D, respectively) when compared to localized CaP and benign prostate  
267 hyperplasia. Human kidney tissues were used as a positive control. As negative controls, tissues  
268 were stained only with the secondary antibody conjugated with FITC or red fluorescence protein  
269 (RFP).

270

### 271 **TCF4 has an oncogenic function**

272 To assess the effect of TCF4 *in vivo*, we established a doxycycline-inducible TCF4-expressing cell  
273 line, LNCaP-TCF4. After screening multiple clones, the one with the highest induction level of  
274 TCF4 on treatment with 1  $\mu\text{g}/\text{ml}$  of tetracycline was selected and further characterized (clone #3,  
275 Supp Fig 3A). TCF4 induction slightly increased cellular proliferation but the difference was not  
276 statistically significant (Supp Fig 3B). As predicted based on our results, TCF4 induction resulted  
277 in a relative resistance to enzalutamide up to 10  $\mu\text{M}$  when cultured over three days (Supp Fig 3C).  
278 In addition, tetracycline treatment stimulated the expression of NED markers, ChgA, NSE, and  
279 PTHrP (Supp Fig 3D).

280 When LNCaP-TCF4 was injected into flanks of Rag2<sup>-/-</sup>,  $\gamma\text{c}^{-/-}$  immunodeficient mice and  
281 TCF4 expression was induced by doxycycline following surgical castration, a relative resistance  
282 to enzalutamide treatment was observed over a six-week period (Fig 5A). There was no change in  
283 histology among the harvested tumors regardless of the grouping (Fig 5B). Immunofluorescence  
284 microscopy demonstrated that enzalutamide treatment or TCF4 induction (doxy) increased the

285 expression of the NED marker, PTHrP (Fig 5C). In addition, co-localization of TCF4 and PTHrP  
286 was confirmed. Subsequently, immunoblot confirmed the immunofluorescence microscopy results  
287 in that increased TCF4 and PTHrP proteins were observed in groups treated with either  
288 enzalutamide or doxycycline (Fig 5D). QPCR demonstrated an increase in TCF4 and PTHrP  
289 mRNA levels upon treatment with enzalutamide as well as doxycycline (Fig 5E). Collectively,  
290 these results suggest that TCF4 renders CaP cells more aggressive.

291

### 292 **TCF4 inhibitor and PTHrP antagonist inhibit the proliferation of enzalutamide resistant** 293 **prostate cancer cells *in vivo***

294 To study the therapeutic potential of targeting the TCF4/PTHrP axis, we carried out an *in vivo*  
295 study with LNCaP-EnzR in mice. After establishing tumor xenografts, all animals underwent a  
296 bilateral orchiectomy and were administered 10 mg/kg of enzalutamide via oral gavage daily. To  
297 predesignated groups, 0.85 mg/kg of PKF-118-310, 0.2 mg/kg of PTHrP<sub>(7-34)</sub>, or both in  
298 combination were delivered daily. At the end of seven weeks, the results demonstrated that  
299 PKF118-310 and PTHrP<sub>(7-34)</sub> dramatically when combined with enzalutamide decreased the  
300 tumor xenograft growth dramatically compared to that of enzalutamide monotherapy (control)  
301 over a seven-week period (Fig 6A). However, there were no synergistic effect between PKF118-  
302 310 and PTHrP antagonist, PTHrP<sub>(7-34)</sub>. Again, H&E staining showed no significant changes in  
303 the histology of the treated xenografts (Fig 6B). Immunofluorescence microscopy confirmed the  
304 co-localization of TCF4 and PTHrP while MFI measurement demonstrated that PKF118-310  
305 treatment decreased PTHrP protein levels (Fig 6C). However, PTHrP<sub>(7-34)</sub> treatment again had no  
306 effect on TCF4 expression. Also consistent with the mechanism of action of PKF118-310 in  
307 which the interaction between TCF4 and B-catenin is disrupted, PKF118-310 treatment did not

308 alter the expression levels of TCF4. These observations collectively support our concept that  
309 TCF4 is an upstream signaling molecule of PTHrP. Supporting the immunofluorescence MFI  
310 result, immunoblot revealed a decrease in PTHrP protein levels following PKF118-310 but not  
311 PTHrP<sub>(7-34)</sub> treatment (Fig 6D) levels. Again, no obvious changes in TCF4 protein level was seen  
312 with either PKF118-310 or PTHrP<sub>(7-34)</sub> administration. Result of the mRNA quantitation for  
313 TCF4 and PTHrP was consistent with that of immunoblot (Fig 6E).

314 Finally, PKF118-310 and PTHrP<sub>(7-34)</sub> as a monotherapy (without enzalutamide) at the  
315 same dosage had a more moderate effect on the growth of LNCaP-EnzR xenografts over a six-  
316 week period (Supp Fig 4A). Compared to the vehicle only control group, enzalutamide treatment  
317 slightly decreased the tumor growth rate. But this difference was not statistically significant.  
318 Again, H&E staining demonstrated no obvious change in histology (Supp Fig 4B). As seen with  
319 above results, immunofluorescence microscopy and MFI showed that PKF118-310 decreased  
320 PTHrP but not TCF4 protein levels (Supp Fig 4C). These observations were supported by the  
321 immunoblot (Supp Fig 4D) and QPCR (Supp Fig 4E). These results collectively suggest that  
322 TCF4 and PTHrP inhibitor may be an effective treatment option in the enzalutamide resistant  
323 CaP cells.

324

## 325 **DISCUSSION**

326 In the present study, we investigated the mechanism of enzalutamide resistance in CaP. After  
327 establishing multiple cell lines that are resistant to enzalutamide, NED was identified as a  
328 significant event through RNAseq. Subsequently, the transcription factor TCF4 was found to  
329 regulate NED which in turn, rendered the cells resistant to enzalutamide in part via PTHrP. *In*

330 *in vivo* studies confirmed the critical role of TCF4 in enzalutamide resistance and NED.  
331 Collectively, these observations demonstrate that enzalutamide stimulates TCF4 transcription  
332 which then leads to NED and treatment resistance. More importantly, the *in vivo* studies suggest  
333 that TCF4 may potentially be a new therapeutic target in patients with CRPC.

334         Castration resistance is the ultimate clinical feature of lethal CaP. Despite being resistant  
335 to castration, CRPC usually has a clinically significant androgen signaling pathway. This  
336 apparent paradox is due to alterations in intracellular androgen synthesis that permit CaP cells to  
337 survive and proliferate under low extracellular androgen concentrations (25-27). Indeed, the  
338 presence of such mechanism in CRPC has been validated clinically with agents such as  
339 abiraterone acetate and enzalutamide that target androgen biosynthesis and androgen receptor,  
340 respectively (28-30).

341         In treating men with CRPC, enzalutamide is a key second generation anti-androgen used  
342 widely due to its ease of administration as well as a low toxicity profile (6). Notwithstanding, as  
343 with all second-generation androgen manipulations, resistance to enzalutamide treatment  
344 emerges inevitably with a median time of 4.8 months (31). Although the precise sequence of  
345 molecular alterations that result in enzalutamide resistance in CaP remains unclear, it is likely  
346 that the mechanism is heterogeneous and involves perturbation of multiple signaling pathways  
347 and factors (32-40). One major proposed mechanism is the aberrant expression of AR splice  
348 variants, especially AR-V7 (32-34). It has been reported that the level of AR-V7 expression  
349 positively correlates with enzalutamide resistance in CaP (32). Another commonly proposed  
350 mechanism of enzalutamide resistance is neuroendocrine trans-differentiation. (37, 38, 41).  
351 Specifically, enzalutamide treatment has been associated with the dysregulated transcription  
352 factors and genetic abnormalities that lead to NED (42-44). A third class of mechanism of



353 enzalutamide resistance is AR point mutation. Among several well-characterized AR point  
354 mutations, T878A (previously T877A) and F877L (previously F876L) have been reported to  
355 increase enzalutamide resistance in CaP cell lines (35, 36). However, AR point mutations do not  
356 appear to be a major mechanism of enzalutamide resistance in our experimental models as AR  
357 mRNA was completely sequenced in all three enzalutamide-resistant cell lines. Rather, our  
358 results suggest NED as the relevant mechanism of enzalutamide resistance in CaP and propose  
359 TCF4 as a key molecule in mediating NED in enzalutamide-resistant CaP cells.

360         Although TCF4 is a transcription factor that has been implicated in the canonical  $\beta$ -  
361 catenin-mediated Wnt signaling (10), present results suggest a new function that is independent  
362 of Wnt signaling: regulation of NED. This activity of TCF4 is dependent on the interaction with  
363  $\beta$ -catenin as confirmed by the results of the  $\beta$ -catenin degradation activator study (XAV939)  
364 (Fig. 3A). However, treating CaP cells with both classical and non-classical Wnts did not induce  
365 NED. In addition, it should be noted that NED in the context of CaP is likely different than the  
366 class small cell neuroendocrine prostate cancer (NEPC) cells. For example, although NEPC do  
367 not express AR (45), cells with NE phenotype in CaP have been reported to express AR (46, 47).  
368 This observation is consistent with the concept of transdifferentiation in which in CaP,  
369 adenocarcinoma cells differentiate into cells expressing NE markers (48, 49). Indeed, Lin and  
370 colleagues have proposed the concept of NE-like CaP cells that have retained some of the  
371 features of CaP adenocarcinoma cells while attaining NE features (50). Regardless, it has  
372 recently been reported that NED accounts for approximately 25% of lethal prostate cancer (51).  
373 Whether TCF4 is involved in all NE-like CaP requires further investigation.

374         The current study also shed additional light on the mechanistic link between NED and  
375 enzalutamide resistance. Using RNAseq as well as overexpression and neutralization studies, we

376 have observed that the transcription factor TCF4 mediates NED upon enzalutamide treatment. Of  
377 the NED markers, we have focused on PTHrP for the subsequently functional studies because  
378 PTHrP has previously been reported to mediate castration resistance (19). In this regard, our data  
379 also support this concept as neutralization of PTHrP reversed enzalutamide resistance. In  
380 addition to blocking PTHrP, we have observed that the TCF4 inhibitor (PKF118-310) increased  
381 enzalutamide sensitivity and decreased PTHrP protein levels in enzalutamide resistant CaP cell  
382 lines in tissue culture and *in vivo*. Therefore, disrupting the NED axis by targeting either TCF4 or  
383 PTHrP may be an effective therapeutic approach in treating CRPC.

384         Despite the potentially significant implications of the current study, our findings should  
385 be accepted with caution for the following reasons. First, there are multiple second-generation  
386 anti-androgens. Thus, additional studies are needed to determine whether TCF4-mediated NED  
387 is a class-specific effect. Second, the molecular connection between TCF4 and enzalutamide is  
388 not clear. Currently, we are exploring a potential interaction between androgen receptor and  
389 TCF4.

390         In conclusion, the present study suggests that TCF4 mediates enzalutamide resistance via  
391 a Wnt-independent pathway. In addition, we have observed that blocking NED via TCF4 or  
392 PTHrP inhibitors is potentially therapeutic. In the future, we plan to continue uncovering the  
393 molecular link between enzalutamide and TCF4/NED as well as further characterizing the  
394 therapeutic potential of blocking TCF4 or PTHrP.

395

396 **Funding**

397 This work was supported by the Prostate Cancer Research Program Idea Development Award for  
398 Established Investigators from the United States Department of Defense Office of the  
399 Congressionally Directed Medical Research Program (W81XWH-17-1-0359), cancer center grant  
400 from the National Cancer Institute (Grant P30CA072720), generous support from the Marion and  
401 Norman Tanzman Charitable Foundation and Mr. Malcolm Wernik.

402

### 403 **References**

- 404 1. Siegel RL, Miller KD, Jemal A. Cancer Statistics, 2017. *CA Cancer J Clin.* 2017;67(1):7-30.
- 405 2. Crawford ED, Eisenberger MA, McLeod DG, Spaulding JT, Benson R, Dorr FA, et al. A controlled  
406 trial of leuprolide with and without flutamide in prostatic carcinoma. *N Engl J Med.* 1989;321(7):419-24.
- 407 3. Schellhammer P, Sharifi R, Block N, Soloway M, Venner P, Patterson AL, et al. Maximal androgen  
408 blockade for patients with metastatic prostate cancer: outcome of a controlled trial of bicalutamide  
409 versus flutamide, each in combination with luteinizing hormone-releasing hormone analogue therapy.  
410 Casodex Combination Study Group. *Urology.* 1996;47(1A Suppl):54-60; discussion 80-4.
- 411 4. Debes JD, Tindall DJ. Mechanisms of androgen-refractory prostate cancer. *N Engl J Med.*  
412 2004;351(15):1488-90.
- 413 5. Feldman BJ, Feldman D. The development of androgen-independent prostate cancer. *Nat Rev*  
414 *Cancer.* 2001;1(1):34-45.
- 415 6. Ha YS, Kim IY. Enzalutamide: looking back at its preclinical discovery. *Expert Opin Drug Discov.*  
416 2014;9(7):837-45.
- 417 7. Beer TM, Armstrong AJ, Rathkopf DE, Loriot Y, Sternberg CN, Higano CS, et al. Enzalutamide in  
418 metastatic prostate cancer before chemotherapy. *The New England journal of medicine.*  
419 2014;371(5):424-33.
- 420 8. Shore ND, Chowdhury S, Villers A, Klotz L, Siemens DR, Phung D, et al. Efficacy and safety of  
421 enzalutamide versus bicalutamide for patients with metastatic prostate cancer (TERRAIN): a  
422 randomised, double-blind, phase 2 study. *The Lancet Oncology.* 2016;17(2):153-63.
- 423 9. Suzman DL, Lubner B, Schweizer MT, Nadal R, Antonarakis ES. Clinical activity of enzalutamide  
424 versus docetaxel in men with castration-resistant prostate cancer progressing after abiraterone. *The*  
425 *Prostate.* 2014;74(13):1278-85.
- 426 10. MacDonald BT, Tamai K, He X. Wnt/beta-catenin signaling: components, mechanisms, and  
427 diseases. *Dev Cell.* 2009;17(1):9-26.
- 428 11. Lee GT, Kang DI, Ha YS, Jung YS, Chung J, Min K, et al. Prostate cancer bone metastases acquire  
429 resistance to androgen deprivation via WNT5A-mediated BMP-6 induction. *Br J Cancer.*  
430 2014;110(6):1634-44.
- 431 12. Syed Khaja AS, Helczynski L, Edsjo A, Ehrnstrom R, Lindgren A, Ulmert D, et al. Elevated level of  
432 Wnt5a protein in localized prostate cancer tissue is associated with better outcome. *PLoS One.*  
433 2011;6(10):e26539.

- 434 13. Thiele S, Gobel A, Rachner TD, Fuessel S, Froehner M, Muders MH, et al. WNT5A has anti-  
435 prostate cancer effects in vitro and reduces tumor growth in the skeleton in vivo. *J Bone Miner Res.*  
436 2015;30(3):471-80.
- 437 14. Wei W, Chua MS, Grepper S, So S. Small molecule antagonists of Tcf4/beta-catenin complex  
438 inhibit the growth of HCC cells in vitro and in vivo. *Int J Cancer.* 2010;126(10):2426-36.
- 439 15. Calcagni A, Kors L, Verschuren E, De Cegli R, Zampelli N, Nusco E, et al. Modelling TFE renal cell  
440 carcinoma in mice reveals a critical role of WNT signaling. *Elife.* 2016;5.
- 441 16. Wang Y, Lei R, Zhuang X, Zhang N, Pan H, Li G, et al. DLC1-dependent parathyroid hormone-like  
442 hormone inhibition suppresses breast cancer bone metastasis. *J Clin Invest.* 2014;124(4):1646-59.
- 443 17. Shah RB, Mehra R, Chinnaiyan AM, Shen R, Ghosh D, Zhou M, et al. Androgen-independent  
444 prostate cancer is a heterogeneous group of diseases: lessons from a rapid autopsy program. *Cancer*  
445 *Res.* 2004;64(24):9209-16.
- 446 18. DaSilva J, Gioeli D, Weber MJ, Parsons SJ. The neuroendocrine-derived peptide parathyroid  
447 hormone-related protein promotes prostate cancer cell growth by stabilizing the androgen receptor.  
448 *Cancer Res.* 2009;69(18):7402-11.
- 449 19. DaSilva JO, Amorino GP, Casarez EV, Pemberton B, Parsons SJ. Neuroendocrine-derived peptides  
450 promote prostate cancer cell survival through activation of IGF-1R signaling. *Prostate.* 2013;73(8):801-  
451 12.
- 452 20. Reya T, Clevers H. Wnt signalling in stem cells and cancer. *Nature.* 2005;434(7035):843-50.
- 453 21. Fang L, Zhu Q, Neuenschwander M, Specker E, Wulf-Goldenberg A, Weis WI, et al. A Small-  
454 Molecule Antagonist of the beta-Catenin/TCF4 Interaction Blocks the Self-Renewal of Cancer Stem Cells  
455 and Suppresses Tumorigenesis. *Cancer Res.* 2016;76(4):891-901.
- 456 22. Huang SM, Mishina YM, Liu S, Cheung A, Stegmeier F, Michaud GA, et al. Tankyrase inhibition  
457 stabilizes axin and antagonizes Wnt signalling. *Nature.* 2009;461(7264):614-20.
- 458 23. Lepourcelet M, Chen YN, France DS, Wang H, Crews P, Petersen F, et al. Small-molecule  
459 antagonists of the oncogenic Tcf/beta-catenin protein complex. *Cancer Cell.* 2004;5(1):91-102.
- 460 24. Rosenblatt M, Caulfield MP, Fisher JE, Horiuchi N, McKee RL, Rodan SB, et al. A tumor-secreted  
461 protein associated with human hypercalcemia of malignancy. *Biology and molecular biology. Ann N Y*  
462 *Acad Sci.* 1988;548:137-45.
- 463 25. Suzuki K, Nishiyama T, Hara N, Yamana K, Takahashi K, Labrie F. Importance of the intracrine  
464 metabolism of adrenal androgens in androgen-dependent prostate cancer. *Prostate Cancer Prostatic*  
465 *Dis.* 2007;10(3):301-6.
- 466 26. Titus MA, Schell MJ, Lih FB, Tomer KB, Mohler JL. Testosterone and dihydrotestosterone tissue  
467 levels in recurrent prostate cancer. *Clin Cancer Res.* 2005;11(13):4653-7.
- 468 27. Mohler JL, Gregory CW, Ford OH, 3rd, Kim D, Weaver CM, Petrusz P, et al. The androgen axis in  
469 recurrent prostate cancer. *Clin Cancer Res.* 2004;10(2):440-8.
- 470 28. Scher HI, Fizazi K, Saad F, Taplin ME, Sternberg CN, Miller K, et al. Increased survival with  
471 enzalutamide in prostate cancer after chemotherapy. *N Engl J Med.* 2012;367(13):1187-97.
- 472 29. Ha YS, Goodin S, DiPaola RS, Kim IY. Enzalutamide for the treatment of castration-resistant  
473 prostate cancer. *Drugs Today (Barc).* 2013;49(1):7-13.
- 474 30. Ryan CJ, Smith MR, de Bono JS, Molina A, Logothetis CJ, de Souza P, et al. Abiraterone in  
475 metastatic prostate cancer without previous chemotherapy. *N Engl J Med.* 2013;368(2):138-48.
- 476 31. Ramadan WH, Kabbara WK, Al Basiouni Al Masri HS. Enzalutamide for patients with metastatic  
477 castration-resistant prostate cancer. *Onco Targets Ther.* 2015;8:871-6.
- 478 32. Antonarakis ES, Lu C, Wang H, Lubber B, Nakazawa M, Roeser JC, et al. AR-V7 and resistance to  
479 enzalutamide and abiraterone in prostate cancer. *N Engl J Med.* 2014;371(11):1028-38.
- 480 33. Steinestel J, Luedeke M, Arndt A, Schnoeller TJ, Lennerz JK, Wurm C, et al. Detecting predictive  
481 androgen receptor modifications in circulating prostate cancer cells. *Oncotarget.* 2015.

- 482 34. Efsthathiou E, Titus M, Wen S, Hoang A, Karlou M, Ashe R, et al. Molecular characterization of  
483 enzalutamide-treated bone metastatic castration-resistant prostate cancer. *European urology*.  
484 2015;67(1):53-60.
- 485 35. Prekovic S, van Royen ME, Voet AR, Geverts B, Houtman R, Melchers D, et al. The Effect of F877L  
486 and T878A Mutations on Androgen Receptor Response to Enzalutamide. *Mol Cancer Ther*.  
487 2016;15(7):1702-12.
- 488 36. Lallous N, Volik SV, Awrey S, Leblanc E, Tse R, Murillo J, et al. Functional analysis of androgen  
489 receptor mutations that confer anti-androgen resistance identified in circulating cell-free DNA from  
490 prostate cancer patients. *Genome Biol*. 2016;17:10.
- 491 37. Aparicio A, Logothetis CJ, Maity SN. Understanding the lethal variant of prostate cancer: power  
492 of examining extremes. *Cancer discovery*. 2011;1(6):466-8.
- 493 38. Mosquera JM, Beltran H, Park K, MacDonald TY, Robinson BD, Tagawa ST, et al. Concurrent  
494 AURKA and MYCN gene amplifications are harbingers of lethal treatment-related neuroendocrine  
495 prostate cancer. *Neoplasia*. 2013;15(1):1-10.
- 496 39. Bishop JL, Sio A, Angeles A, Roberts ME, Azad AA, Chi KN, et al. PD-L1 is highly expressed in  
497 Enzalutamide resistant prostate cancer. *Oncotarget*. 2015;6(1):234-42.
- 498 40. Ramos RN, de Moraes CJ, Zelante B, Barbuto JA. What are the molecules involved in regulatory  
499 T-cells induction by dendritic cells in cancer? *Clin Dev Immunol*. 2013;2013:806025.
- 500 41. Tan HL, Sood A, Rahimi HA, Wang W, Gupta N, Hicks J, et al. Rb loss is characteristic of prostatic  
501 small cell neuroendocrine carcinoma. *Clinical cancer research : an official journal of the American  
502 Association for Cancer Research*. 2014;20(4):890-903.
- 503 42. Maroto P, Solsona E, Gallardo E, Mellado B, Morote J, Arranz JA, et al. Expert opinion on first-  
504 line therapy in the treatment of castration-resistant prostate cancer. *Crit Rev Oncol Hematol*.  
505 2016;100:127-36.
- 506 43. Svensson C, Ceder J, Iglesias-Gato D, Chuan YC, Pang ST, Bjartell A, et al. REST mediates  
507 androgen receptor actions on gene repression and predicts early recurrence of prostate cancer. *Nucleic  
508 Acids Res*. 2014;42(2):999-1015.
- 509 44. Dang Q, Li L, Xie H, He D, Chen J, Song W, et al. Anti-androgen enzalutamide enhances prostate  
510 cancer neuroendocrine (NE) differentiation via altering the infiltrated mast cells --> androgen receptor  
511 (AR) --> miRNA32 signals. *Mol Oncol*. 2015;9(7):1241-51.
- 512 45. Wang W, Epstein JI. Small cell carcinoma of the prostate. A morphologic and  
513 immunohistochemical study of 95 cases. *Am J Surg Pathol*. 2008;32(1):65-71.
- 514 46. Wang H, Sun D, Ji P, Mohler J, Zhu L. An AR-Skp2 pathway for proliferation of androgen-  
515 dependent prostate-cancer cells. *J Cell Sci*. 2008;121(Pt 15):2578-87.
- 516 47. Komiya A, Yasuda K, Watanabe A, Fujiuchi Y, Tsuzuki T, Fuse H. The prognostic significance of  
517 loss of the androgen receptor and neuroendocrine differentiation in prostate biopsy specimens among  
518 castration-resistant prostate cancer patients. *Mol Clin Oncol*. 2013;1(2):257-62.
- 519 48. Sainio M, Visakorpi T, Tolonen T, Ilvesaro J, Bova GS. Expression of neuroendocrine  
520 differentiation markers in lethal metastatic castration-resistant prostate cancer. *Pathol Res Pract*.  
521 2018;214(6):848-56.
- 522 49. Komiya A, Suzuki H, Imamoto T, Kamiya N, Nihei N, Naya Y, et al. Neuroendocrine differentiation  
523 in the progression of prostate cancer. *Int J Urol*. 2009;16(1):37-44.
- 524 50. Yuan TC, Veeramani S, Lin MF. Neuroendocrine-like prostate cancer cells: neuroendocrine  
525 transdifferentiation of prostate adenocarcinoma cells. *Endocr Relat Cancer*. 2007;14(3):531-47.
- 526 51. Beltran H, Tagawa ST, Park K, MacDonald T, Milowsky MI, Mosquera JM, et al. Challenges in  
527 recognizing treatment-related neuroendocrine prostate cancer. *J Clin Oncol*. 2012;30(36):e386-9.

528



## 530 **Figure Legends**

531 **Figure 1.** TCF4 mediates NED in human prostate cancer cell lines. **A.** Unsupervised  
532 comparison of transcriptome of LNCaP cultured in FBS vs charcoal-stripped FBS (cFBS) was  
533 carried out. **B.** Comparison of transcriptome between LNCaP-cFBS and LNCaP-Enz (resistant  
534 to enzalutamide). Markers of NED (ChgA, NSE, and PTHrP) were significantly increased in  
535 LNCaP-EnzR. **C.** Human prostate cancer cell lines LNCaP and 22Rv1 were treated with  
536 increasing concentrations of enzalutamide (0-10  $\mu$ M) under an androgen-deprived condition  
537 (RPMI-1640/10% cFBS) for 48 hours. Immunoblot demonstrated that NED markers (ChgA,  
538 NSE, and PTHrP) were induced by enzalutamide. **D.** QPCR demonstrated that NED marker  
539 (ChgA, NSE, and PTHrP) mRNA expression levels increased also after treatment with  
540 enzalutamide at the indicated concentrations (0-10  $\mu$ M) for 48 hours.

541

542 **Figure 2.** TCF4 mediated enzalutamide resistance in human prostate cancer cell lines. **A.** TCF4  
543 cDNA was transiently transfected into LNCaP, 22Rv1, and VCaP using lipofectamine. Cells  
544 were analyzed 48 hours after transfection. The results demonstrated that the overexpression of  
545 TCF4 induced the mRNA expression levels of LNCaP, 22Rv1, and VCaP. As control, parental  
546 lines transfected with the plasmid backbone was used. **B.** In addition to increasing NED,  
547 overexpression of TCF4 increased the cellular proliferation rate of LNCaP, VCaP, and 22Rv1.  
548 The result shows cell counts at 72 hours after transfection. **C.** LNCaP and 22Rv1 were treated  
549 with enzalutamide for 48 hours. Where indicated, TCF4 or the control POU2F2 expression was  
550 silenced using shRNA approach. Increased protein levels of neuroendocrine markers following  
551 enzalutamide (enz) treatment was blocked by TCF4 shRNA in LNCaP and 22Rv1. POU2F2 was



552 used as a negative control because it is a transcription factor whose consensus binding element  
553 was also found commonly in the promoter regions of the neuroendocrine markers. **D.** LNCaP  
554 was treated with 10  $\mu$ M enzalutamide and cells were harvested at the indicated time. Kinetics of  
555 NED markers and TCF4 transcription following enzalutamide treatment was analyzed using  
556 QPCR. The results demonstrated increased mRNA levels of TCF4 in 3 hours while the  
557 expression levels of NED markers (ChgA, NSE, and PTHrP) was induced at 24 hours. This  
558 observation suggests that TCF4 signals upstream of NED markers.

559

560 **Figure 3.** Effect of blocking TCF4/ $\beta$ -catenin (PKF118-310) or PTHrP (PTHrP<sub>(7-34)</sub>) on  
561 enzalutamide resistant prostate cancer cells. **A.** LNCaP, 22Rv1, and VCaP were treated with  
562 enzalutamide (10  $\mu$ M) and/or XAV939 (10  $\mu$ M),  $\beta$ -catenin degradation activator for 48 hours.  
563 XAV939 treatment was carried out 5 min prior to the addition of enzalutamide. PTHrP mRNA  
564 induction after 48 hours of treatment with 10  $\mu$ M enzalutamide was completely blocked by  
565 XAV939,  $\beta$ -catenin inhibitor in LNCaP, 22Rv1 and VCaP. **B.** LNCaP, 22Rv1, and VCaP were  
566 treated with 10  $\mu$ M enzalutamide for 48 hours. The PTHrP receptor, PTH1R, mRNA level  
567 significantly increased after enzalutamide treatment in all three cell lines. **C.** Three  
568 enzalutamide-resistant human prostate cancer cell lines (LNCaP-EnzR, 22Rv1-EnzR, and VCaP-  
569 EnzR) were treated with 10  $\mu$ M enzalutamide and increasing concentrations of PKF118-310 and  
570 PTHrP<sub>(7-34)</sub> as indicated. After 48 hours, viable cells were counted. In the presence of 10  $\mu$ M  
571 Enz, PKF118-310 or PTHrP<sub>(7-34)</sub> increased enzalutamide sensitivity in the enzalutamide resistant  
572 prostate cancer cell lines, LNCaP-EnzR, VCaP-EnzR, and 22Rv1-EnzR. **D.** Enzalutamide-  
573 resistant human prostate cancer cell lines were treated with a fixed concentration of PKF118-310



574 (5  $\mu$ M) or PTHrP<sub>(7-34)</sub> (10  $\mu$ M) and varying concentrations of enzalutamide (0-10  $\mu$ M). After 48  
575 hours, viable cells were counted. In the presence of 5  $\mu$ M of PKF118-310 or 10  $\mu$ M of PTHrP<sub>(7-  
576 34)</sub>, enzalutamide inhibited cellular proliferation in a concentration-dependent manner.

577

578 **Figure 4.** Human CRPC tissue microarray (TMA) analysis. TMA was obtained from the rapid  
579 autopsy program at the University of Michigan. This array contains 51 CRPC samples as well as  
580 16 benign prostate tissues and 12 localized prostate cancer tissues for controls. **A.**

581 Immunofluorescence microscopy demonstrated a consistent co-localization of TCF4 (red) and

582 PTHrP (green) in CRPC tissues. **B.** There was a correlation between PTHrP and TCF4

583 expression. **C.** Protein expression levels of TCF4 and **D.** PTHrP in patients with localized CaP

584 (Local CaP) and metastatic CaP (Meta CaP). TCF4 and PTHrP protein levels were higher in CaP

585 when compared with benign and increased even further in metastatic group when compared with

586 localized CaP group. Benign n=16, Local CaP n=12, meta CaP n=51.

587

588 **Figure 5.** TCF4 induces enzalutamide resistance in the human prostate cancer cell line, LNCaP.

589 LNCaP transfected with tetracycline-inducible TCF4 plasmid (LNCaP-TCF4) was injected into

590 the flanks of twenty Rag2<sup>-/-</sup>,  $\gamma$ <sub>c</sub><sup>-/-</sup> immunodeficient mice. When tumors reached an average size

591 of 3 mm, the mice were divided into four groups of five each. Where indicated, 10 mg/kg

592 enzalutamide was delivered orally daily. In the designated groups, TCF4 was delivering

593 doxycycline via the drinking water. At the end of the indicated duration, all tumors were

594 harvested and analyzed for protein and mRNA expression. **A.** When TCF4 expression was

595 induced with doxycycline (Doxy), tumor growth rate increased when compared to the control

596 group. In the absence of TCF4 induction, enzalutamide treatment slowed tumor growth rate.  
597 However, enzalutamide treatment had no demonstrable inhibitory effect in TCF4-induced  
598 doxycycline group. Con = LNCaP-TCF4 without doxycycline. Enz = enzalutamide. **B.** H&E  
599 staining. There was no difference among all groups. **C.** Immunofluorescence staining for PTHrP  
600 (green), TCF4 (red) with DAPI (blue) staining. Increased TCF4 and PTHrP protein levels were  
601 observed following the induction of TCF4 with doxycycline. Directly supporting the tissue  
602 culture data, enzalutamide treatment also increased protein levels of TCF4 and PTHrP. **D and E.**  
603 Effect of enzalutamide and TCF4 overexpression on TCF4 and PTHrP by western blot analysis  
604 (**D**) and QPCR (**E**). Immunoblot and QPCR both demonstrated increased expression of TCF4  
605 and PTHrP following TCF4 induction (Doxy). A more modest increase in TCF4 and PTHrP  
606 expression was observed with enzalutamide (enz) treatment. Error bars indicate average  $\pm$  SE  
607 and \* p-value<0.05.

608

609 **Figure 6.** Effect of TCF4/ $\beta$ -catenin inhibitor (PKF118-310) and PTHrP antagonist (PTHrP<sub>(7-34)</sub>)  
610 in enzalutamide-resistant prostate cancer. After injection of LNCaP-EnzR into the flanks of forty  
611 Rag2<sup>-/-</sup>,  $\gamma_c$ <sup>-/-</sup> immunodeficient mice, all mice were surgically castrated divided into four groups  
612 of ten each. Animals in predesignated groups were treated daily with PKF118-310 (0.85 mg/kg  
613 intraperitoneal) and/or PTHrP<sub>(7-34)</sub> (0.2 mg/kg subcutaneous). All mice were administered daily  
614 10 mg/kg enzalutamide orally. **A.** Treatment of PKF118-310 and/or PTHrP<sub>(7-34)</sub> with 10 mg/kg  
615 enzalutamide decreased tumor growth compare with vehicle treatment control group (con). **B.**  
616 H&E staining. There was no difference among all groups. **C.** Immunofluorescence staining for  
617 TCF4 (green), PTHrP (red) with DAPI (blue) staining. Consistent with its mechanism of action,

618 PFK118-310 treatment decreased PTHrP protein levels. However, there was no effect on TCF4  
619 levels. In contrast, PTHrP<sub>(7-34)</sub> had no demonstrable effect on the protein levels of both TCF4 and  
620 PTHrP. Treatment of PKF118-310 decreased PTHrP protein (**D**) and mRNA expression (**E**).  
621 Error bars indicate average  $\pm$  SE and \* p-value<0.05.

**Fig.1 Lee et al.**

**A** Fold change  
(LNCaP-cFBS vs LNCaP-EnzR)

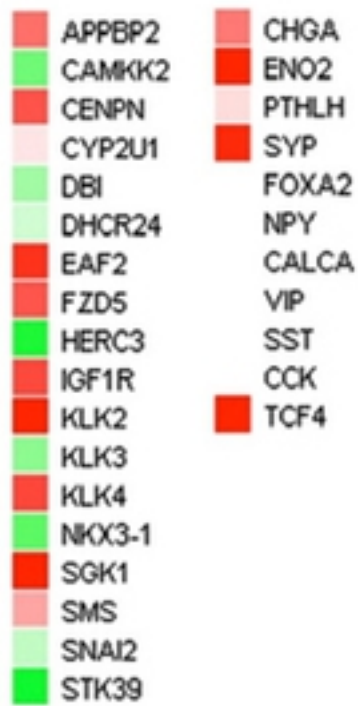

**B** Fold change  
(LNCaP vs LNCaP-cFBS)

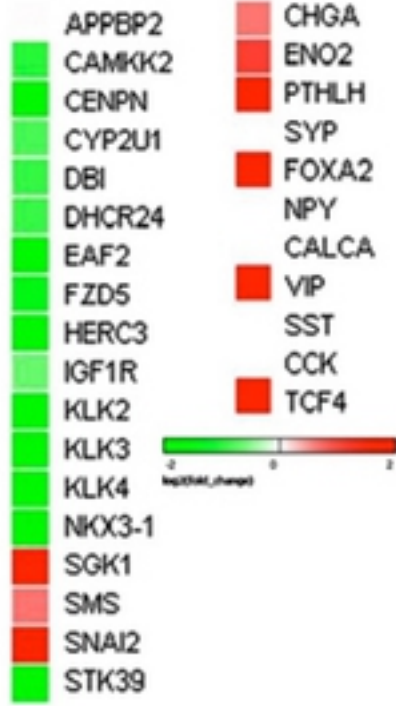

**C**

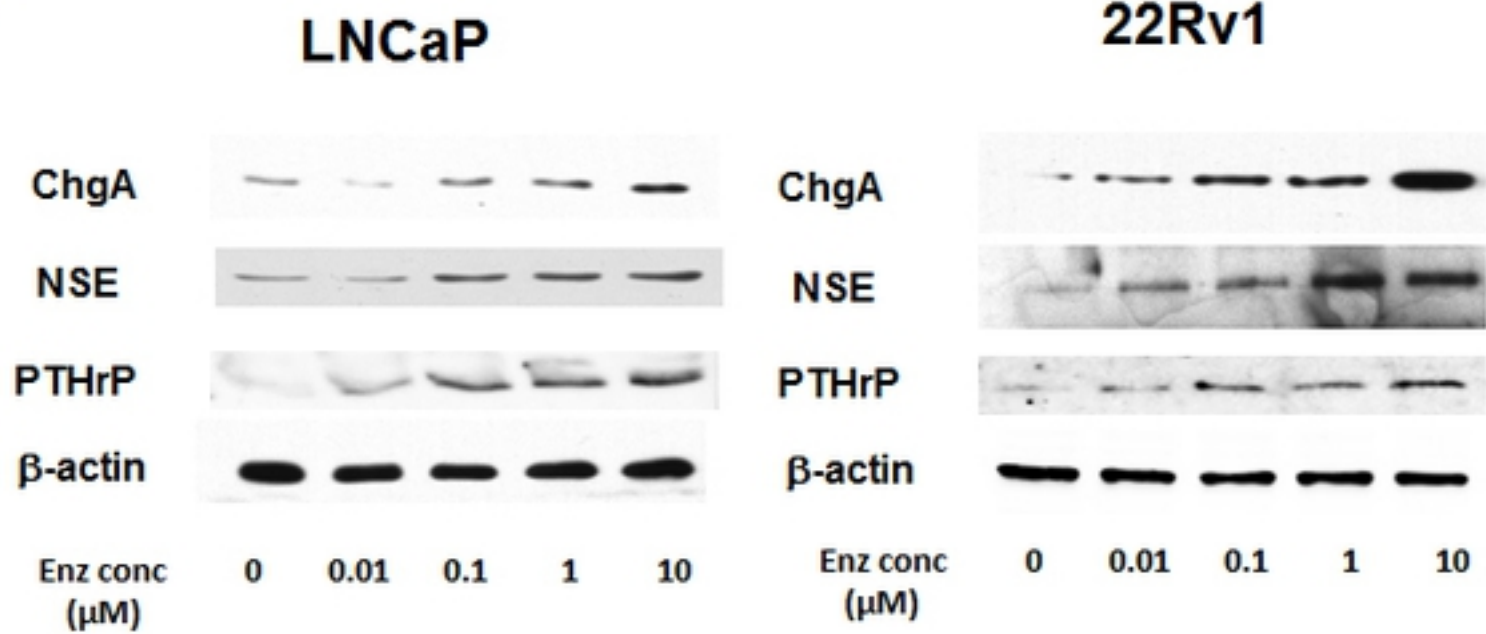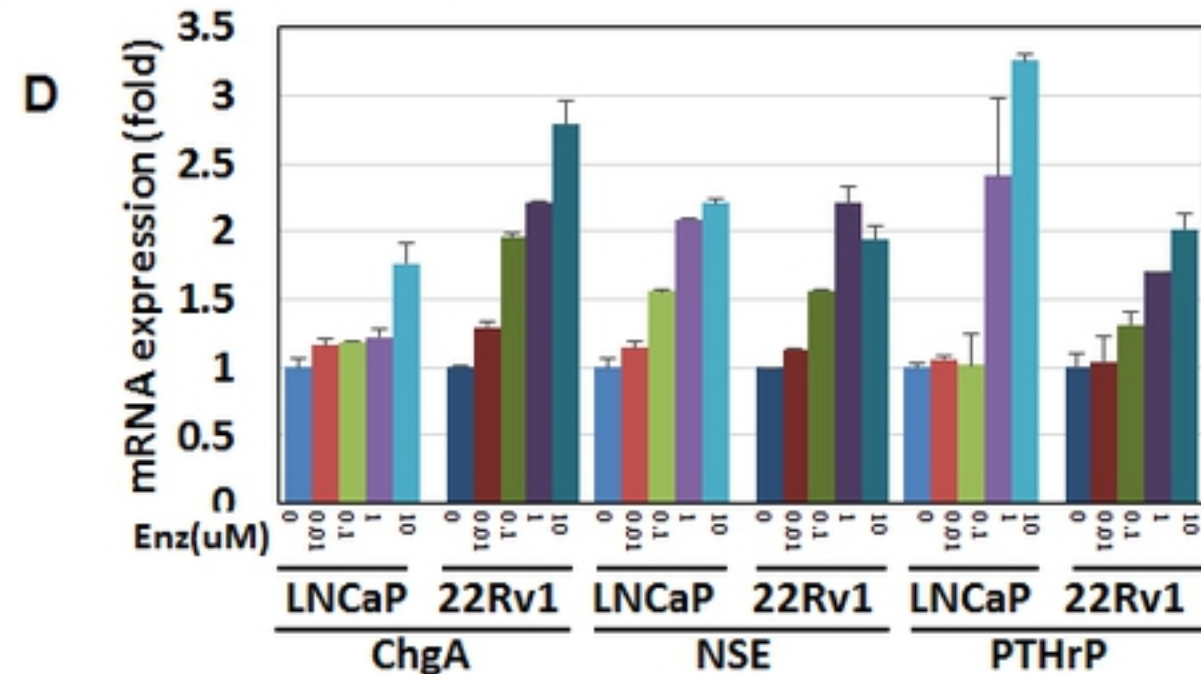

Figure 1

Fig.2 Lee et al.

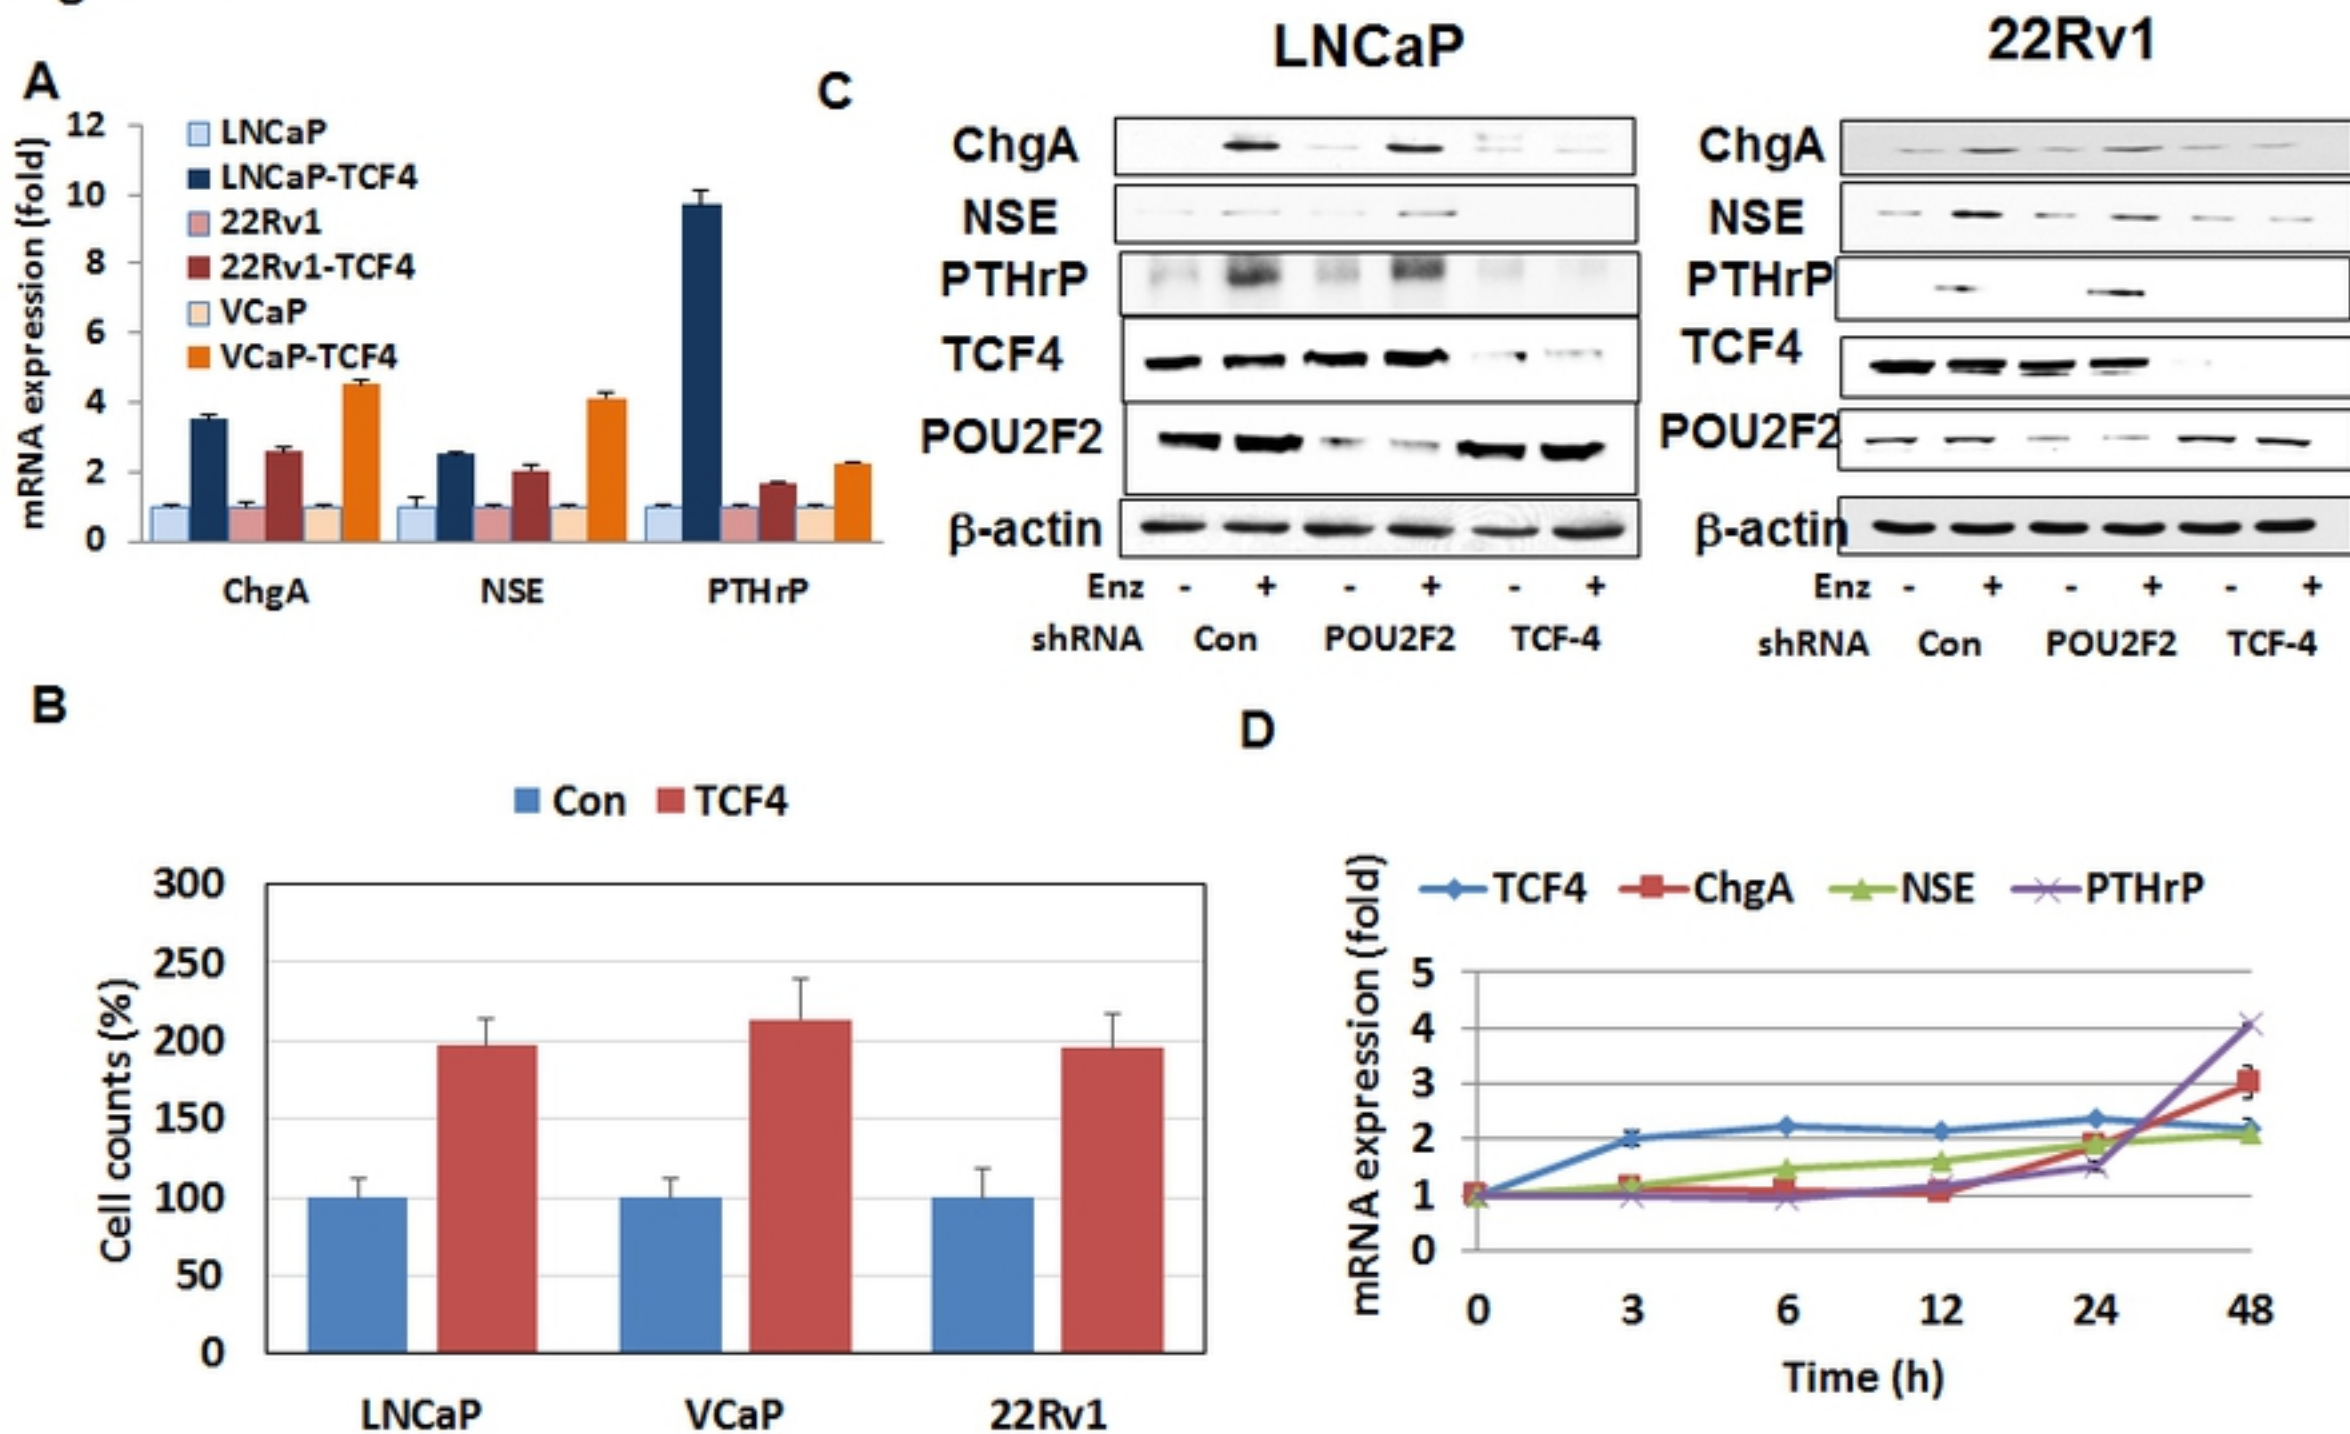

Figure 2



Fig.3 Lee et al.

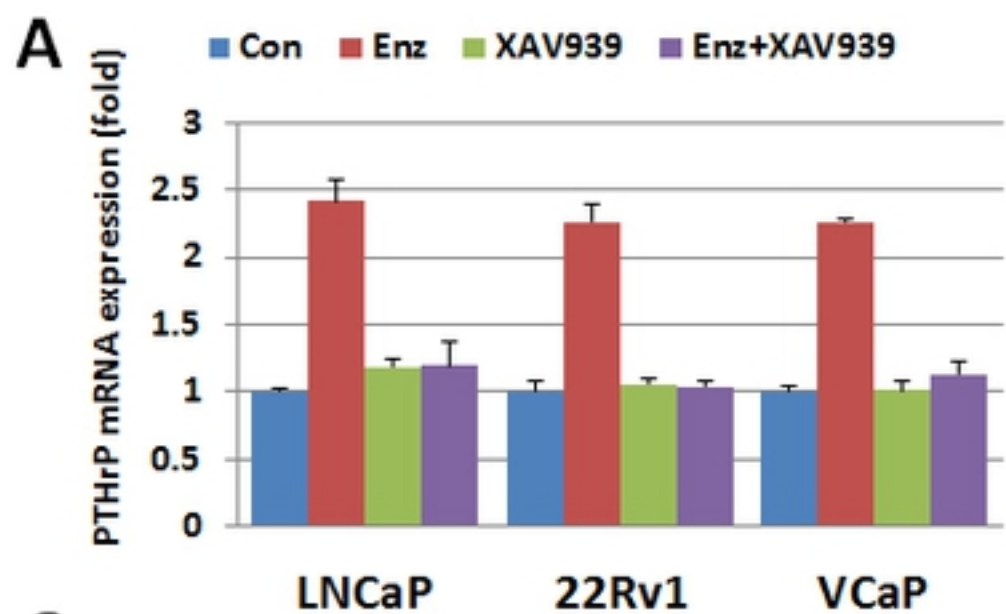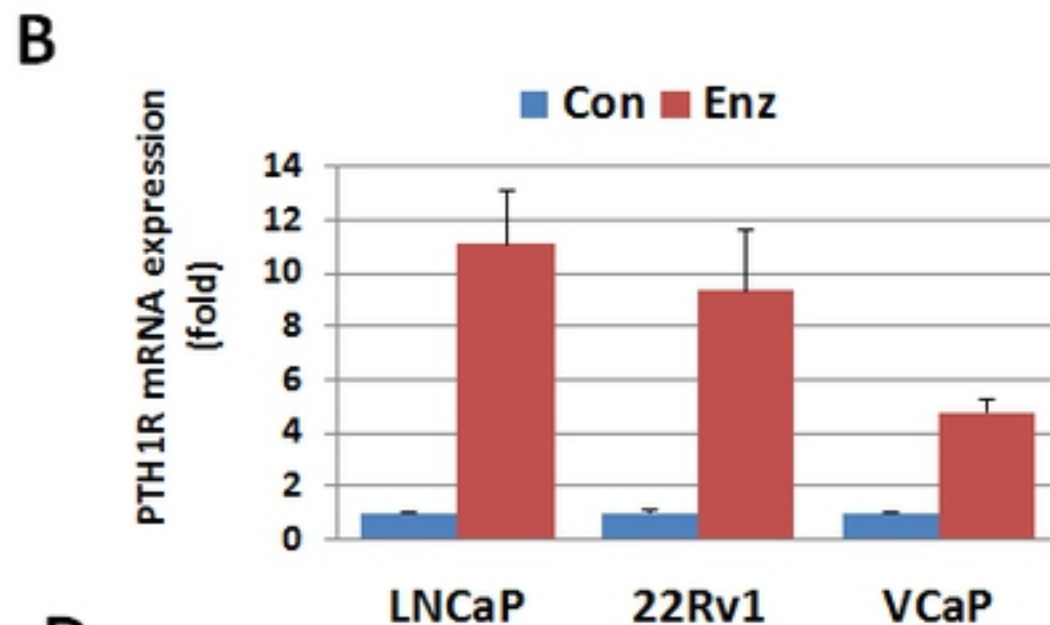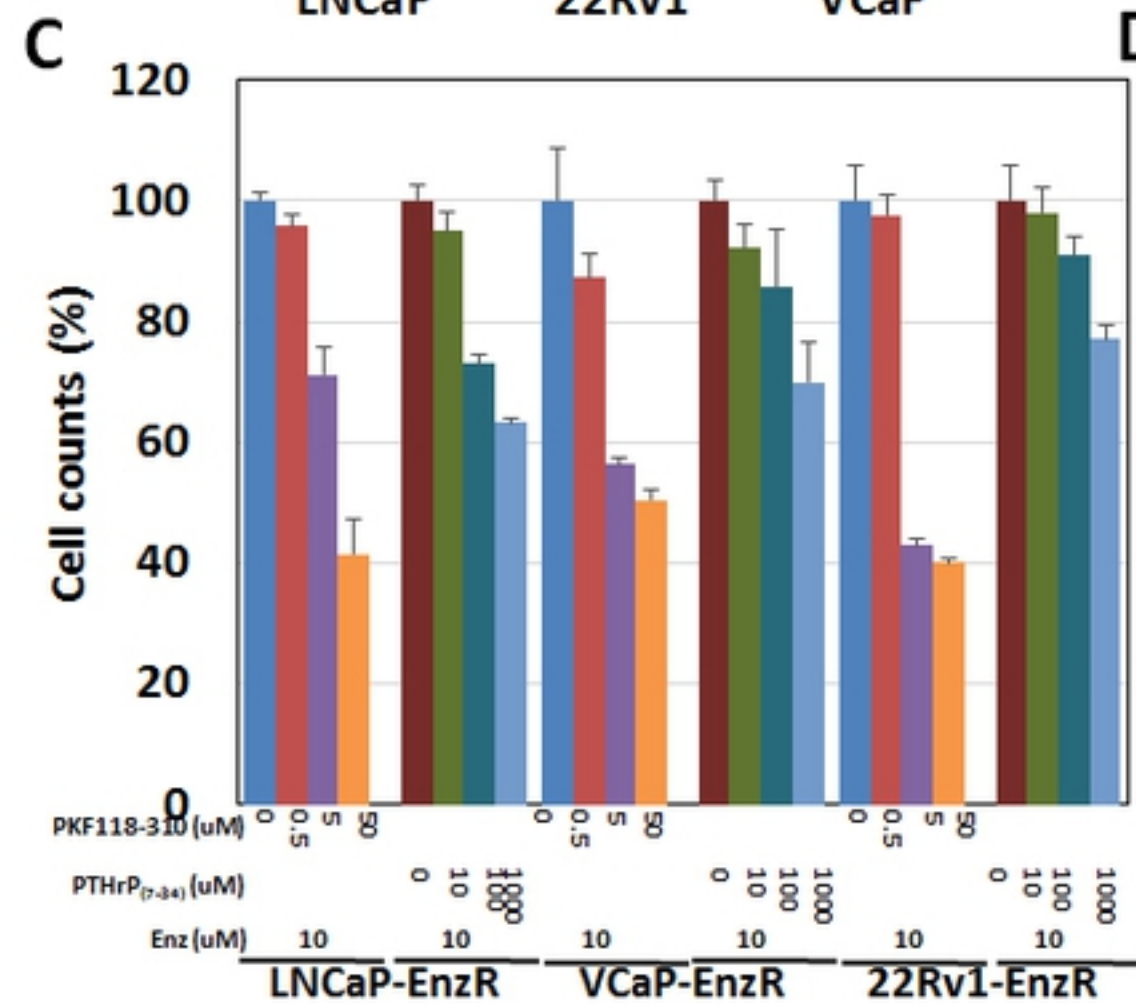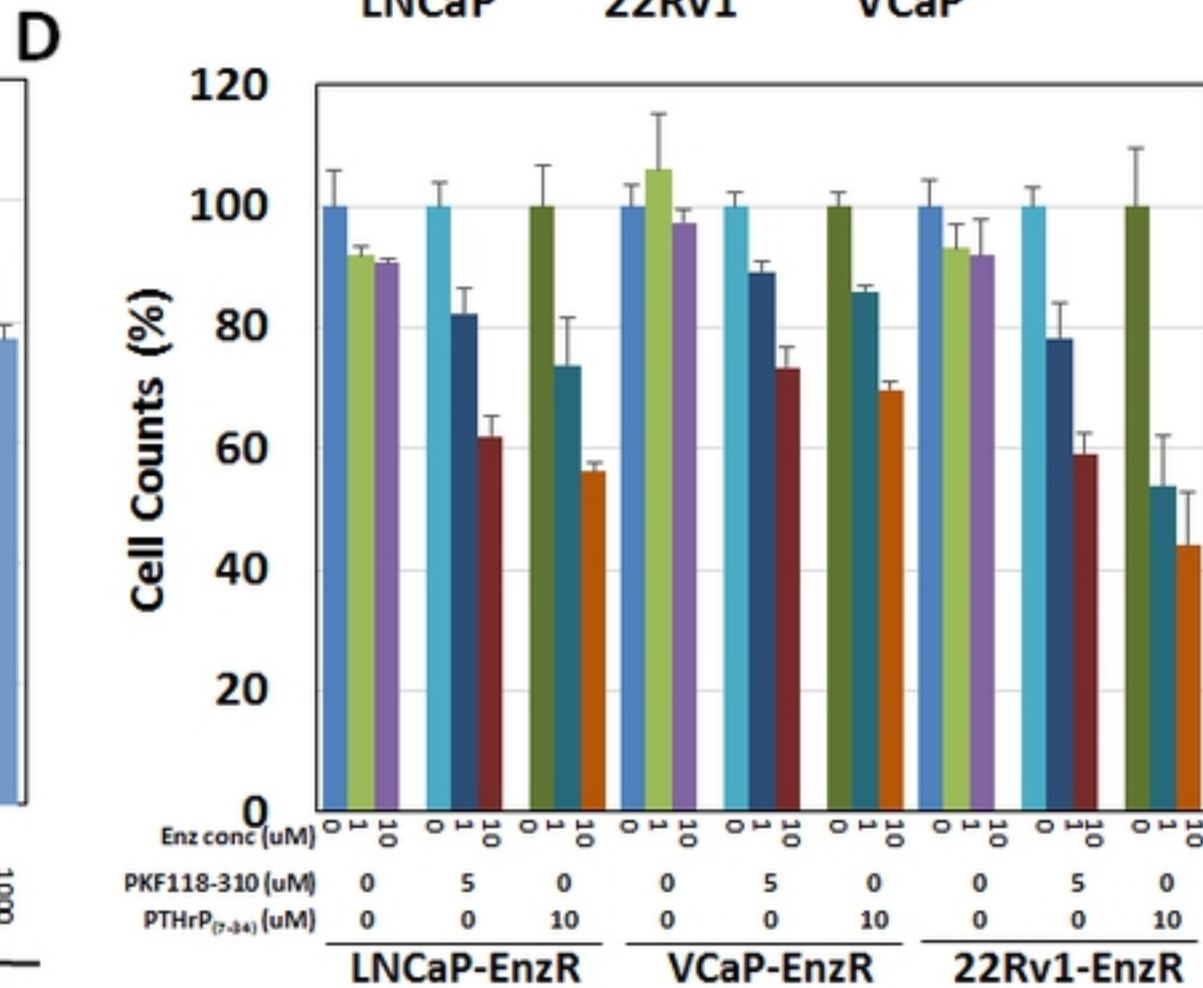

Figure 3

Fig.4 Lee et al.

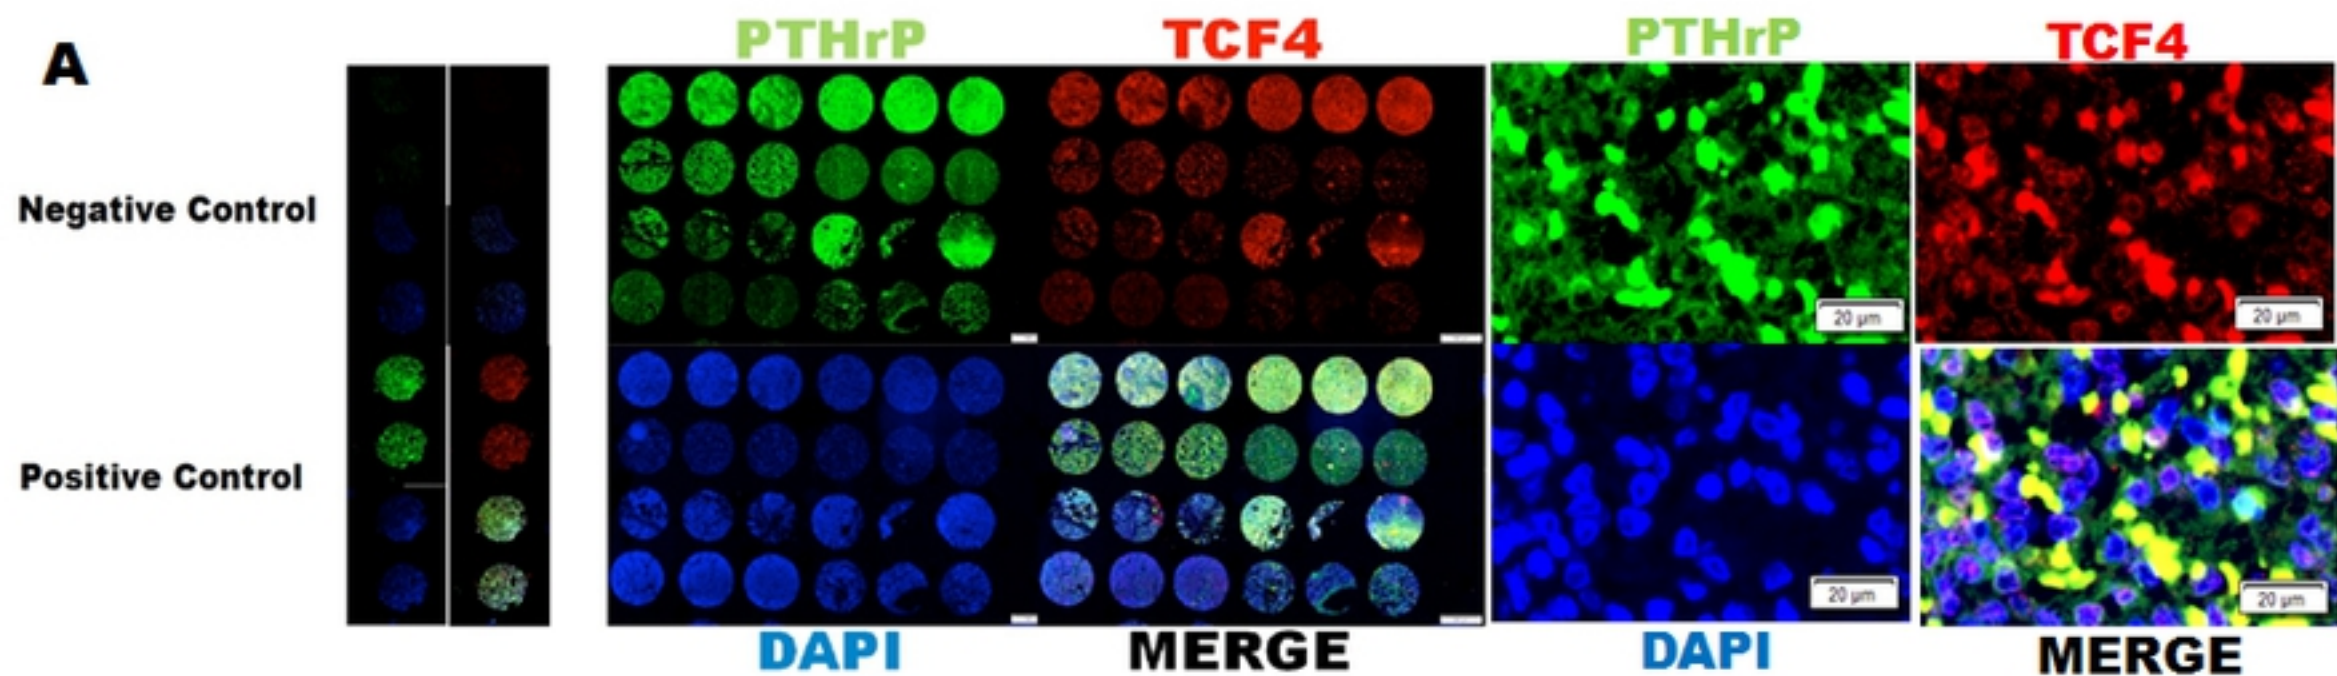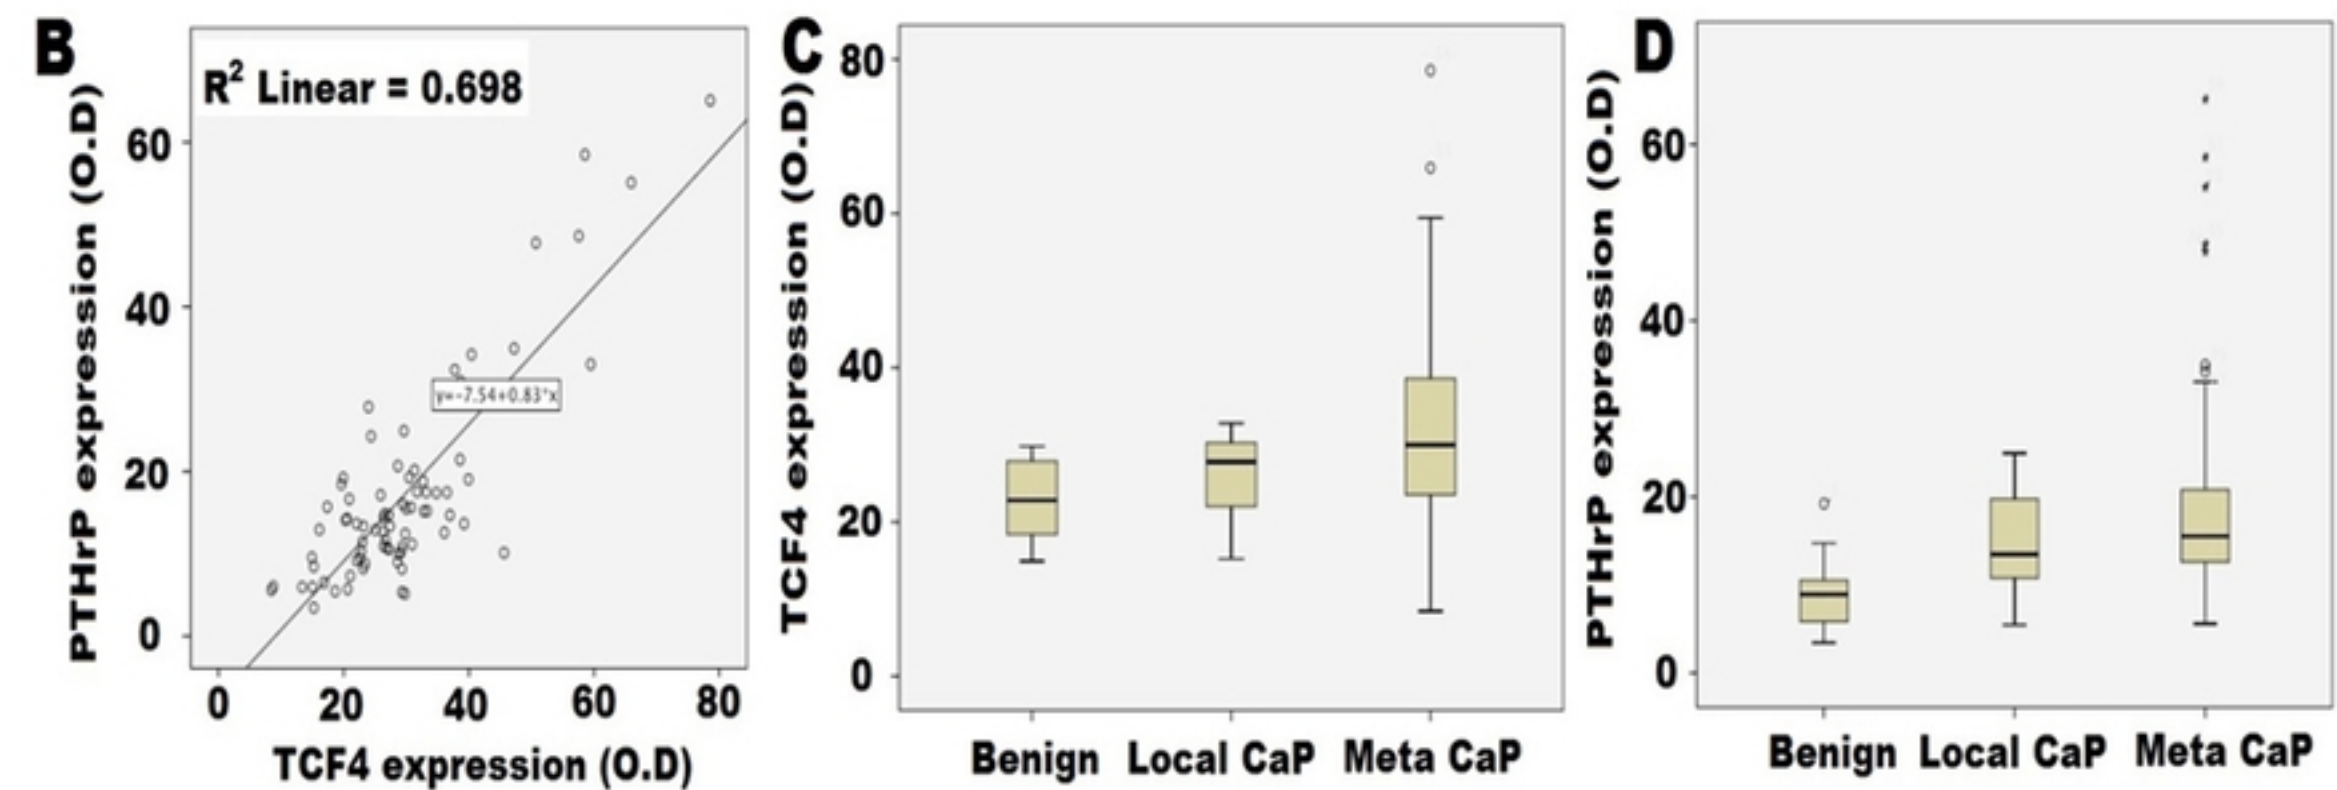

Figure 4



Fig.5 Lee et al.

**A**

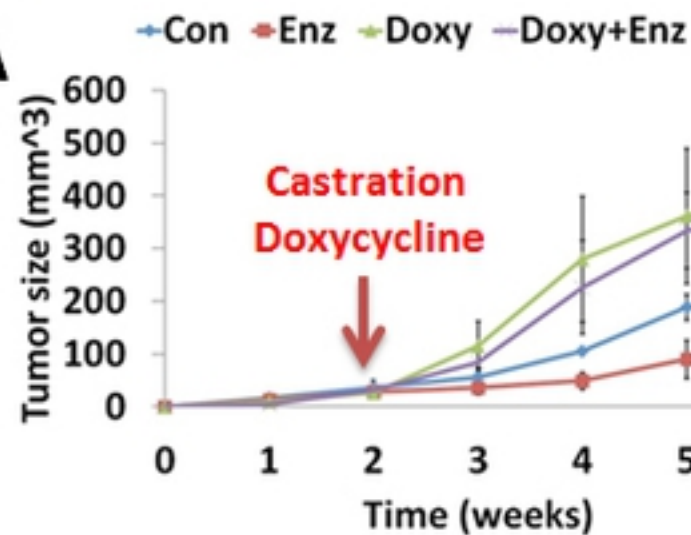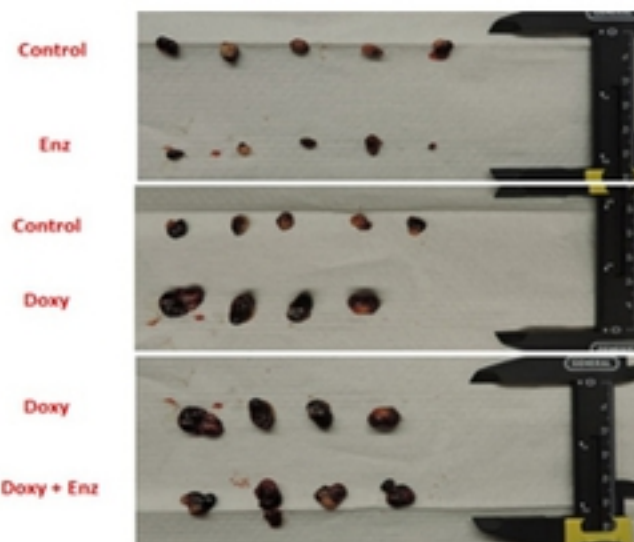

**B**

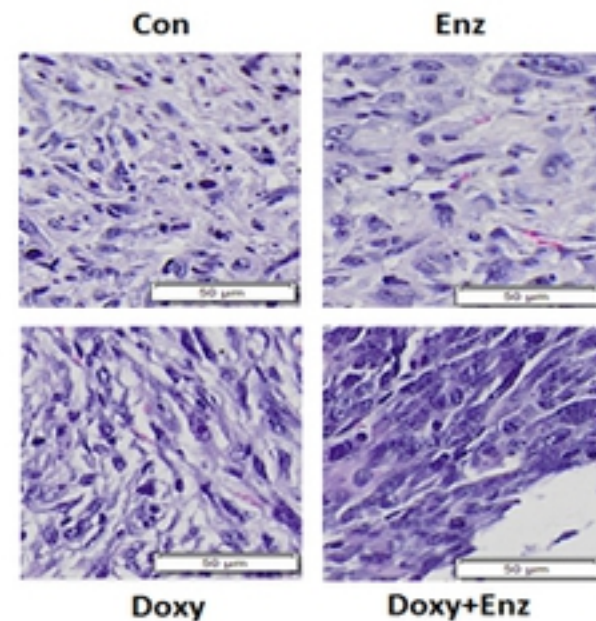

**C**

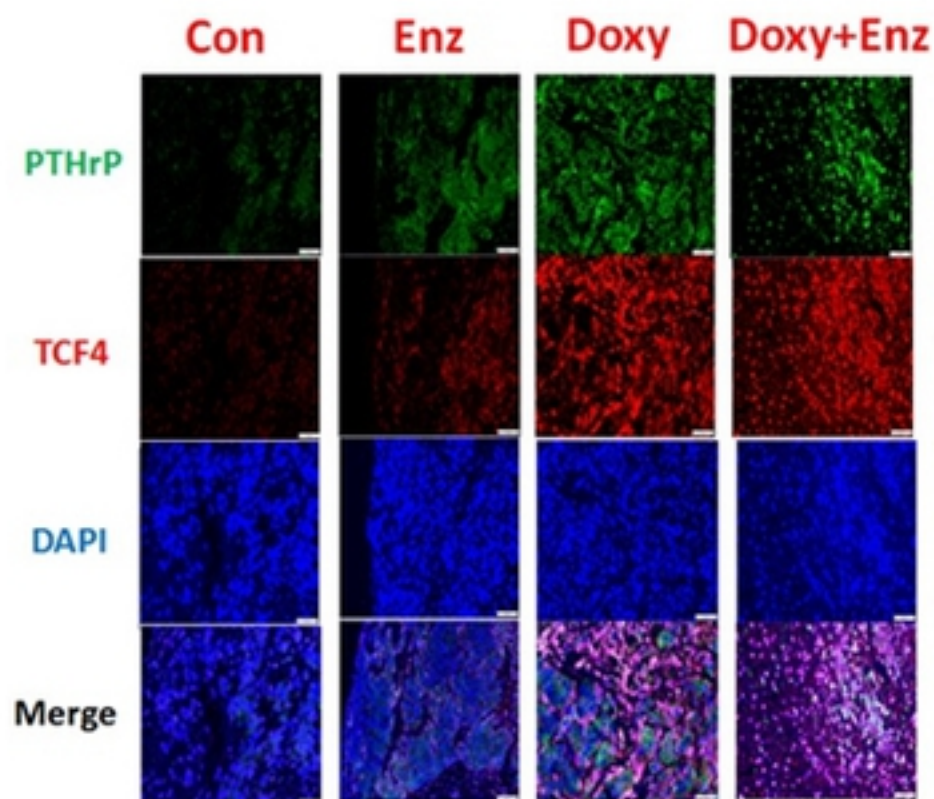

**D**

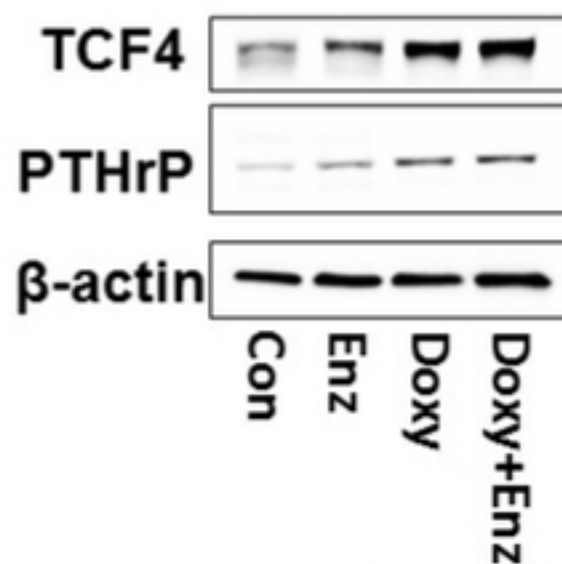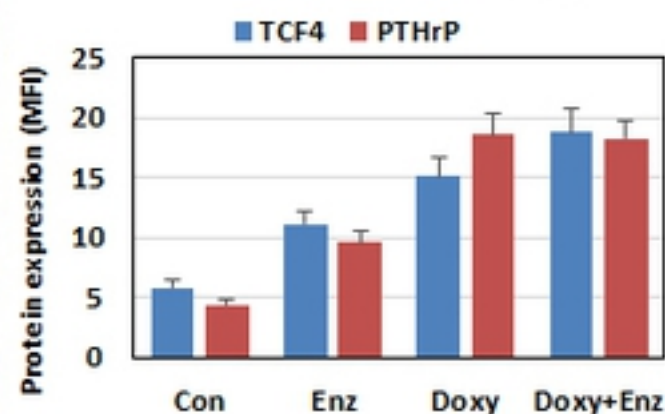

**E**

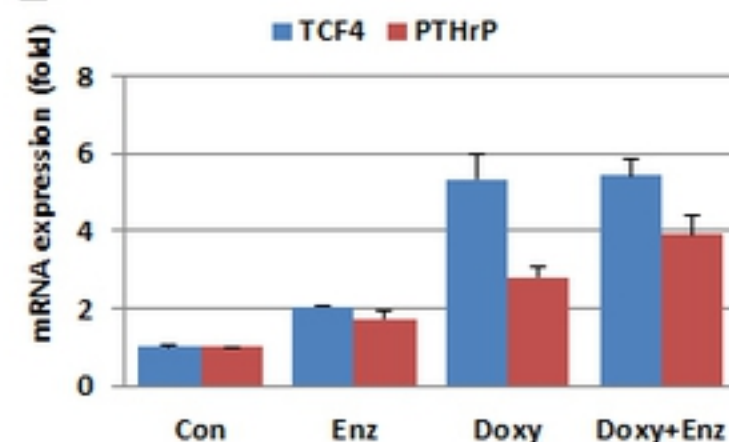

Figure 5



**Fig.6 Lee et al.**

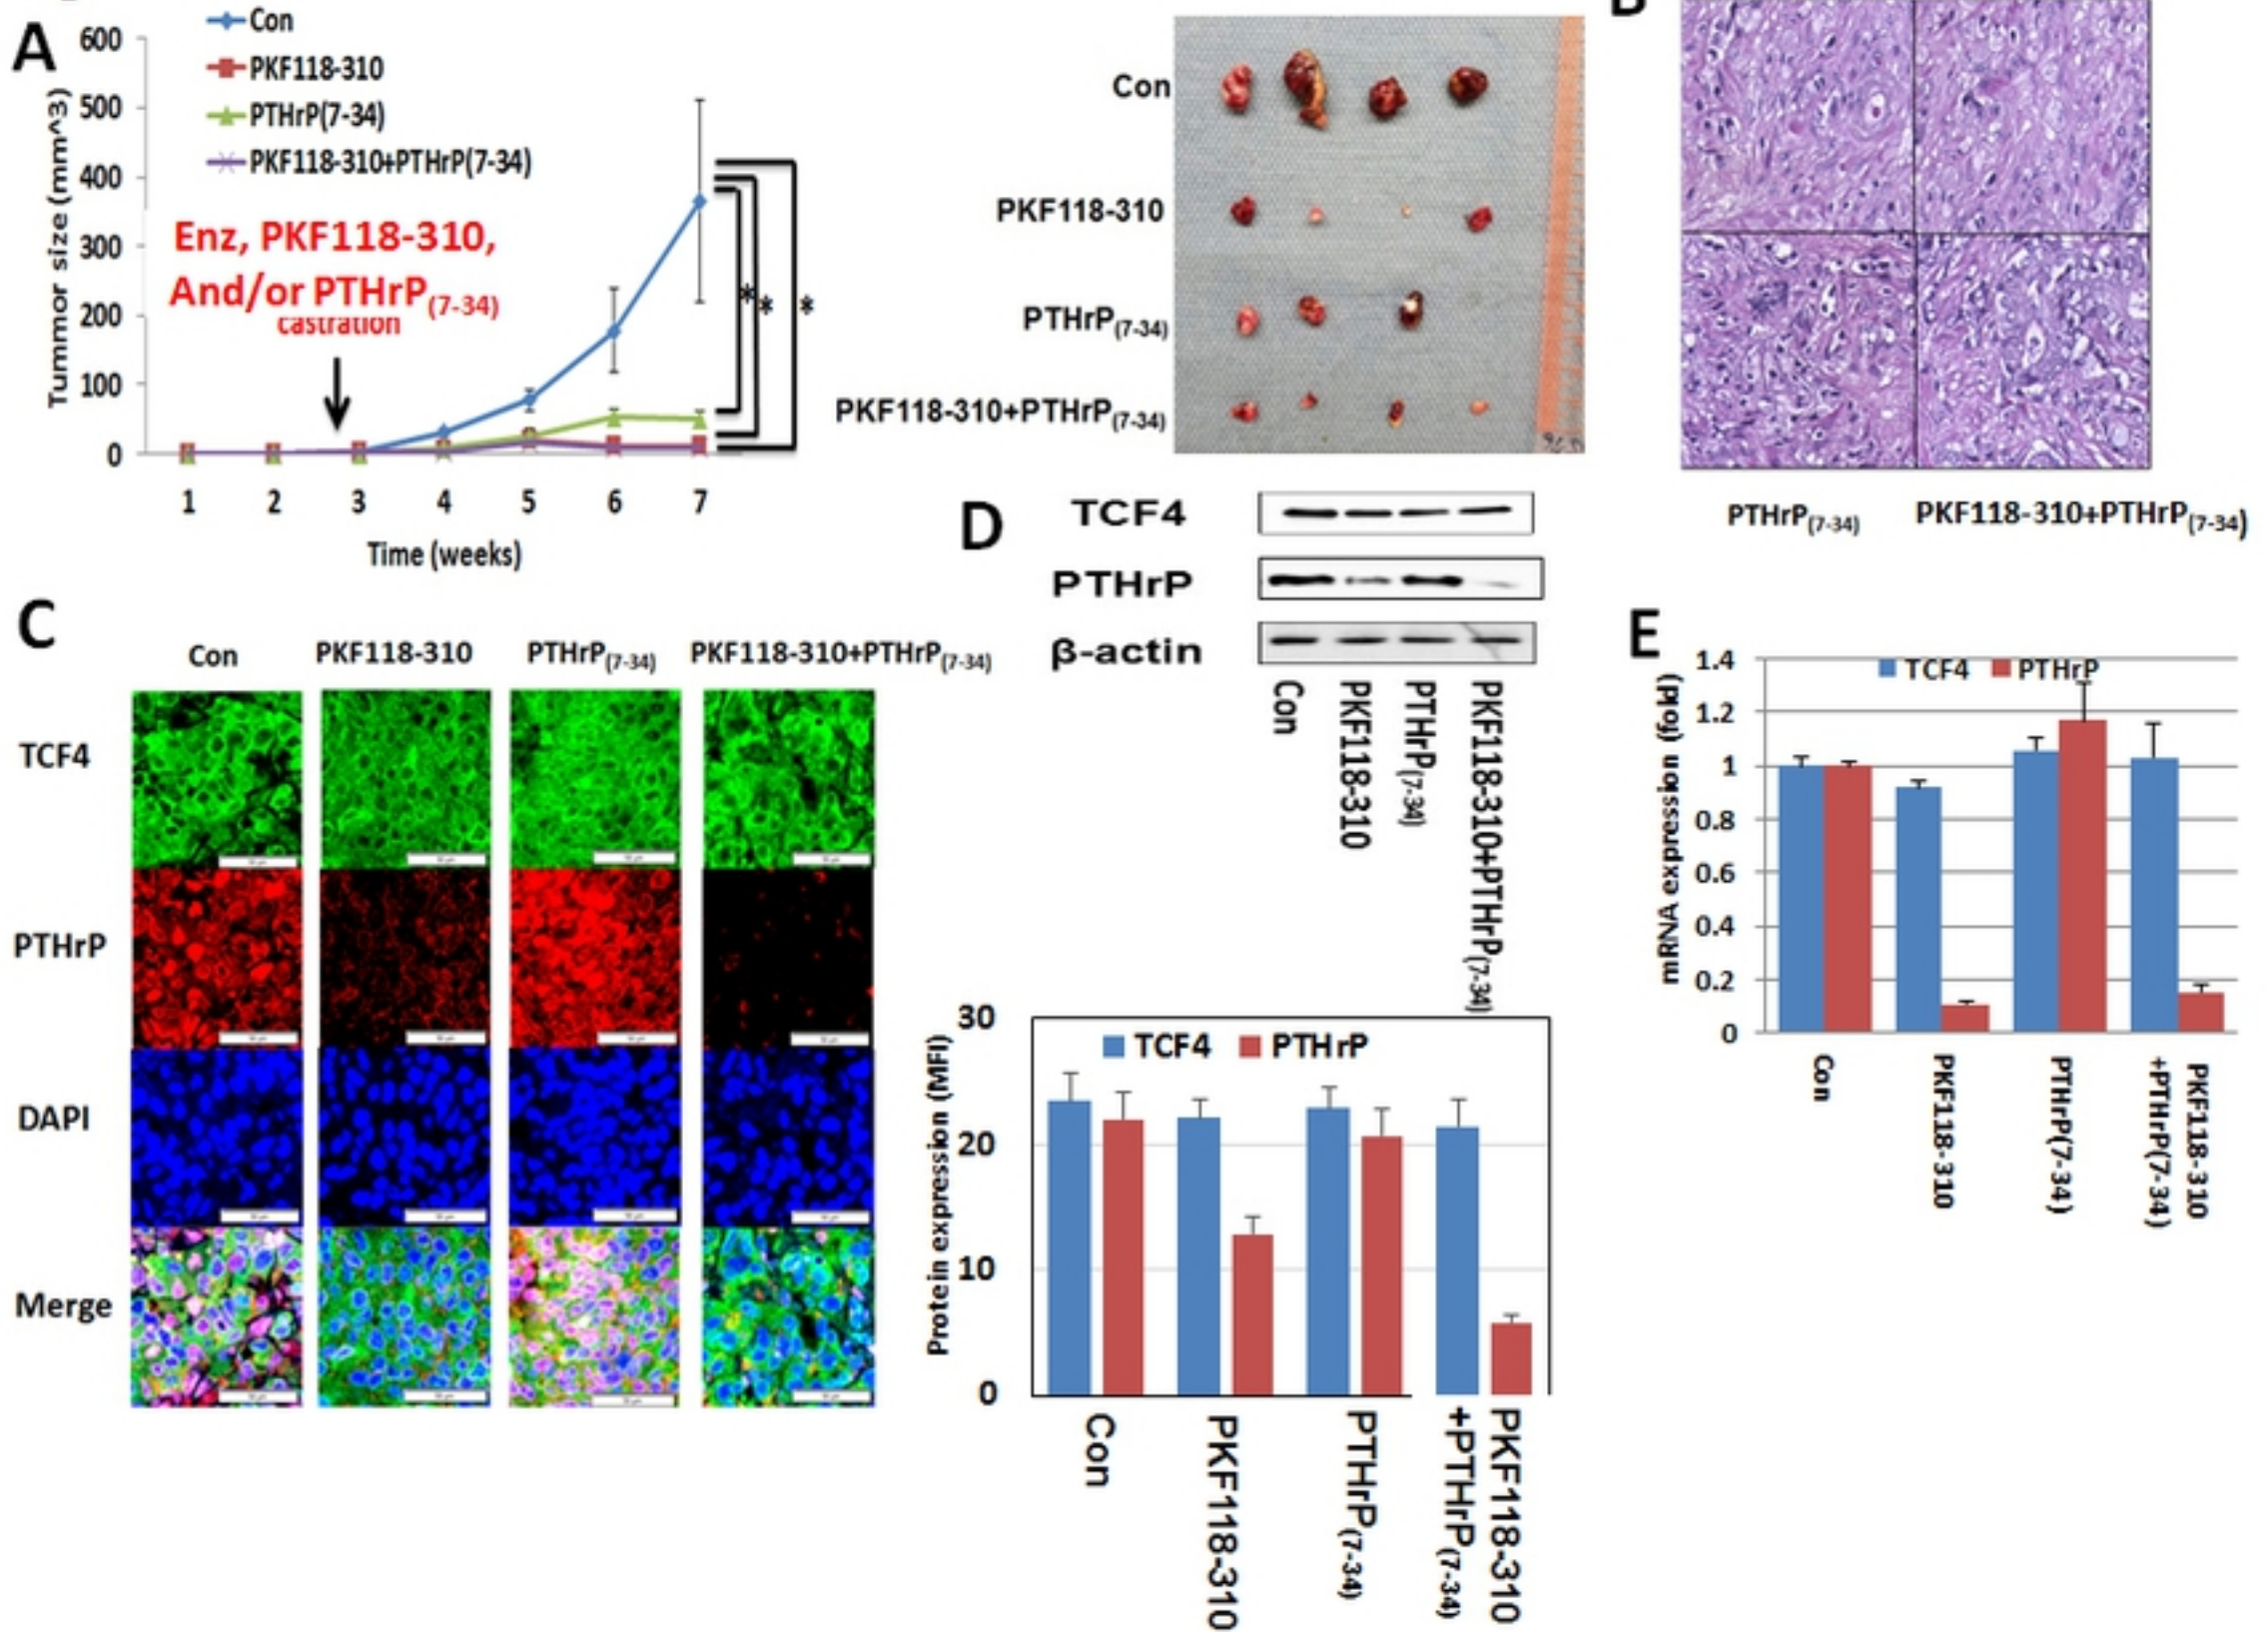

Source: https://www.biorxiv.org/content/10.1101/560821v1.full.pdf
